# Supplementary material for: Suprapapillary Biliary Stents Have Longer Patency Times than Transpapillary Stents—A Systematic Review and Meta-Analysis
Source: MDPI journal article supplement (doi:10.3390/jcm12030898), 2023-01-23
Supplement: s1 [file s1]

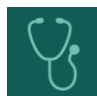

## Supplementary Material

### Tables

**Table S1.** List of excluded publications on the full-text level.

|                                  | Study                                                                                                                                                                                                                                                              | Reason for exclusion |
|----------------------------------|--------------------------------------------------------------------------------------------------------------------------------------------------------------------------------------------------------------------------------------------------------------------|----------------------|
| Aepli et al. 2017 [1]            | Success and complications of an intra-ductal fully covered self-expanding metal stent (ID-FCSEMS) to treat anastomotic biliary strictures (AS) after orthotopic liver transplantation (OLT)                                                                        | PICO                 |
| Al-Kawas et al. 2005 [2]         | Biliary access during endoscopic retrograde cholangiopancreatography: How to precut and a word of caution!                                                                                                                                                         | Study design         |
| Aljahdli et al. 2018 [3]         | Management of distal malignant biliary obstruction                                                                                                                                                                                                                 | Study design         |
| Barresi et al. 2016 [4]          | A Challenging Diagnosis for a Biliary Stricture                                                                                                                                                                                                                    | Study design         |
| Bhalla et al. 2019 [5]           | Endoscopic Management of Acute Cholecystitis Following Metal Stent Placement for Malignant Biliary Strictures: A View from the Inside Looking in                                                                                                                   | Study design         |
| Brijbassie et al. 2015 [6]       | Transpapillary vs. intraductal fully covered selfexpanding metal stent placement for malignant and benign biliary disease: Does it make a difference?                                                                                                              | Duplicate            |
| Chang et al. 2010 [7]            | Usefulness of the rendezvous technique for biliary stricture after adult right-lobe living-donor liver transplantation with duct-to-duct anastomosis                                                                                                               | PICO                 |
| Chang et al. 2012 [8]            | Comparative study of rendezvous techniques in post-liver transplant biliary stricture                                                                                                                                                                              | PICO                 |
| Chantarojanasiri et al. 2018 [9] | Usefulness of stent placement above the papilla, so-called, 'inside stent'                                                                                                                                                                                         | Study design         |
| ChiCtr. 2019 [10]                | Comparative study for the efficacy of intraductal RFA + biliary stent placement or intraductal Iodine-125 seed + biliary stent placement by percutaneous transhepatic cholangial drainage for treating the patients with unresectable malignant biliary strictures | Protocol             |
| ChiCtr. 2019 [11]                | Comparative study of the efficacy of intraductal RFA +stent placement by ERCP and percutaneous transhepatic approach in patients with unresectable malignant biliary strictures                                                                                    | Protocol             |
| Choi et al. 2015 [12]            | Feasibility of self expandable metal stent for preservation of sphincter of Oddi function in patients with common bile duct stones a pilot study                                                                                                                   | PICO                 |
| Choi et al. 2019 [13]            | Newly modified plastic stent for transhepatic placement above the sphincter of Oddi in treatment of biliary anastomotic stricture after liver transplantation: Preliminary report of 7 patient                                                                     | PICO                 |
| Choi et al. 2020 [14]            | Abstract No. 579 Newly modified plastic stent for transhepatic placement above the sphincter of Oddi in treatment of biliary anastomotic stricture after liver transplantation: preliminary report of seven patients                                               | PICO                 |
| Dawwas et al. 2016 [15]          | Endoscopic assessment and management of biliary strictures                                                                                                                                                                                                         | Study design         |
| Douhara et al. 2016 [16]         | Inside plastic stent is useful and safety for malignant biliary stenosis including Bismuth IV                                                                                                                                                                      | PICO                 |

|                             |                                                                                                                                                                                                |                     |
|-----------------------------|------------------------------------------------------------------------------------------------------------------------------------------------------------------------------------------------|---------------------|
|                             |                                                                                                                                                                                                |                     |
| García et al. 2013 [17]     | Difficulties encountered for removing fully covered self-expanding metal stents inserted in benign biliary conditions                                                                          | PICO                |
| Gargouri et al. 2010 [18]   | [Biliary stent occlusion]                                                                                                                                                                      | PICO                |
| Hasegawa et al. 2014 [19]   | Appropriate therapeutic strategy for biliary stenting using threaded inside stents based on the location of the malignant obstruction                                                          | PICO                |
| Hatzidakis et al. 2001 [20] | Nitinol stents for palliative treatment of malignant obstructive jaundice: Should we stent the sphincter of Oddi in every case?                                                                | PICO                |
| Hayasaka et al. 2014 [21]   | Endoscopic placement of a large-bore covered self-expandable metallic stent for cholangitis caused by mucus from a pancreatic mucinous neoplasm                                                | Study design        |
| Hayashi et al. 2018 [22]    | Endoscopic management of unresectable malignant hilar strictures using threaded inside stents versus metallic stents                                                                           | PICO                |
| Hyodo et al. 1998 [23]      | Endoscopic metallic stenting and intraductal ultrasonography in a case of bile duct cancer                                                                                                     | Study design        |
| Inatomi et al. 2011 [24]    | The efficacy and safety of threaded biliary plastic “inside-stent” for malignant hilar obstruction                                                                                             | Duplicate           |
| Inoue et al. 2020 [25]      | Double radiofrequency ablation with metal stent placement for refractory benign biliary and pancreatic duct strictures                                                                         | Study design        |
| Inoue et al. 2020 [26]      | Intraductal placement of a fully covered metal stent with a long string for distal malignant biliary obstruction without endoscopic sphincterotomy: Prospective multi-center feasibility study | PICO                |
| Ishiwatari et al. 2013 [27] | Newly designed plastic stent for endoscopic placement above the sphincter of Oddi in patients with malignant hilar biliary obstruction                                                         | PICO                |
| Itoi et al. 2013 [28]       | Current status and issues regarding biliary stenting in unresectable biliary obstruction                                                                                                       | Study design        |
| Jo et al. 2015 [29]         | Suprapapillary versus transpapillary stent placement for malignant biliary obstruction: which is better?                                                                                       | PICO                |
| Jo et al. 2014 [30]         | Supra-papillary versus trans-papillary biliary stent for malignant biliary obstruction: Which is the better?                                                                                   | Conference abstract |
| Jprn, Umin. 2014 [31]       | Efficacy and Safety of inside stent for preoperative biliary drainage in patients with malignant hilar biliary obstruction: prospective,multicenter,single-arm study                           | Protocol            |
| Jprn, Umin. 2014 [32]       | Efficacy and safety of inside stent in patients with biliary stricture: a prospective multicenter study                                                                                        | Protocol            |
| Jprn, Umin. 2016 [33]       | The efficacy and safety of non-flared fully covered self expandable metallic stent for benign biliary duct stricture                                                                           | Protocol            |
| Jprn, Umin. 2016 [34]       | Usefulness of Non-flared Intraductal Fully Covered Metallic Stent for Refractory Biliary Strictures after Living Donor Liver Transplantation                                                   | Protocol            |
| Jprn, Umin. 2014 [35]       | A Newly Modified Non-Flared Fully Covered Metallic Stent of 12 mm-Diameter with Long Lasso for Intraductal Placement in Patients with Malignant Biliary Stricture: feasibility Study           | Protocol            |
| Jprn, Umin. 2011 [36]       | Plastic stent placement above the sphincter of Oddi ("inside-stent") for patients of malignant hilar biliary obstruction. A prospective phase II trial                                         | Protocol            |
| Jprn, Umin. 2011 [37]       | Endoscopic treatment of malignant bile duct stricture; Comparative study of conventional stent vs inside stent                                                                                 | Protocol            |
| Jprn, Umin. 2011 [38]       | Inside-stent placement for malignant hilar obstruction                                                                                                                                         | Protocol            |

|                           |                                                                                                                                                                                                                                  |              |
|---------------------------|----------------------------------------------------------------------------------------------------------------------------------------------------------------------------------------------------------------------------------|--------------|
| Jprn, Umin. 2018 [39]     | Randomized control trial of inside stenting using plastic stent and side by side stenting using 6mm full-covered self expandable metallic stent for endoscopic bilateral biliary drainage to malignant hilar biliary obstruction | Protocol     |
| Jprn, Umin. 2017 [40]     | Randomized controlled trial on efficacy of metal stents vs. inside plastic stents for unresectable malignant obstruction of the perihilar bile duct                                                                              | Protocol     |
| Jprn, Umin. 2017 [41]     | Safety and efficacy of preoperative biliary drainage using plastic stent above the sphincter of Oddi (Inside-stent) in patients with malignant hilar biliary obstruction: a prospective study                                    | Protocol     |
| Jprn, Umin. 2017 [42]     | The Usefulness of Newly Modified Non-flared Fully Covered Metal Stent of 12 mm in diameter Comparing with Conventional Stent for Periapillary Malignant Biliary Strictures                                                       | Protocol     |
| Jprn, Umin. 2019 [43]     | Efficacy of inside plastic stent placement for malignant hilar biliary obstruction -multicenter, randomized control trial                                                                                                        | Protocol     |
| Jun et al. 2015 [44]      | Feasibility of self-expandable metal stents for preservation of sphincter of Oddi function in patients with common bile duct stones: A pilot study                                                                               | PICO         |
| Kaneko et al. 2014 [45]   | Efficacy of plastic stent placement inside bile ducts for the treatment of unresectable malignant hilar obstruction (with videos)                                                                                                | PICO         |
| Kawakami et al. 2012 [46] | Covered metallic stent for ischemic hilar biliary stricture                                                                                                                                                                      | Study design |
| Kogure et al. 2011 [47]   | Plastic stent placement above the sphincter of Oddi ("inside stent") for biliary strictures                                                                                                                                      | PICO         |
| Kogure et al. 2012 [48]   | Endoscopic management of biliary strictures after adult living donor liver transplantation with duct-to-duct reconstruction                                                                                                      | PICO         |
| Kogure et al. 2013 [49]   | Endoscopic management of biliary strictures after adult living donor liver transplantation with duct-to-duct reconstruction                                                                                                      | PICO         |
| Koizumi et al. 2020 [50]  | Endoscopic stent placement above the sphincter of Oddi for biliary strictures after living donor liver transplantation                                                                                                           | PICO         |
| Koizumi et al. 2019 [51]  | ENDOSCOPIC STENT PLACEMENT ABOVE THE SPHINCTER OF ODDI FOR BILIARY STRICTURES AFTER LIVING DONOR LIVER TRANSPLANTATION                                                                                                           | PICO         |
| Kubota et al. 2015 [52]   | Inside stent and neoadjuvant chemotherapy can provide a chance of surgery in patients with symptomatic, initially unresectable klatskin tumors                                                                                   | Duplicate    |
| Kurita et al. 2013 [53]   | Endoscopic stent placement above the intact sphincter of Oddi for biliary strictures after living donor liver transplantation                                                                                                    | PICO         |
| Lee et al. 2019 [54]      | Usefulness of newly modified fully covered metallic stent of 12 mm in diameter and anti-migration feature for periapillary malignant biliary strictures: Comparison with conventional standard metal stent                       | PICO         |
| Lee et al. 2016 [55]      | Biliary intraductal metastasis from advanced gastric cancer: radiologic and histologic characteristics, and clinical outcomes of percutaneous metallic stent placement                                                           | PICO         |
| Lee et al. 2016 [56]      | Newly developed flower-type covered selfexpandable metal stent for preventing cholecystitis and pancreatitis: Physical properties                                                                                                | PICO         |
| Lee et al. 2000 [57]      | Percutaneous placement of self-expandable metallic biliary stents in malignant extrahepatic strictures: indications of transpapillary and suprapapillary methods                                                                 | PICO         |
| Leung et al. 2008 [58]    | Comparison of accessory performance using a novel ERCP mechanical                                                                                                                                                                | PICO         |

| simulator                 |                                                                                                                                                                                                              |              |
|---------------------------|--------------------------------------------------------------------------------------------------------------------------------------------------------------------------------------------------------------|--------------|
| Li et al. 2014 [59]       | Treatment experience of fully covered self-expandable metal stents in biliary stricture after liver transplantation                                                                                          | PICO         |
| Liu et al. 1998 [60]      | Feasibility of stent placement above the sphincter of Oddi ("inside-stent") for patients with malignant biliary obstruction                                                                                  | PICO         |
| Moon et al. 2012 [61]     | Feasibility of placing a modified fully covered self-expandable metal stent above the papilla to minimize stent-induced bile duct injury in patients with refractory benign biliary strictures (with videos) | PICO         |
| Moon et al. 2015 [62]     | A newly modified non-flared fully covered metallic stent of 12 mm-diameter with long lasso for intraductal placement in patients with malignant biliary stricture: Feasibility study                         | PICO         |
| Moon et al. 2012 [63]     | Biliary drainage with a modified fully covered self-expandable metallic stent for potentially resectable distal malignant biliary obstruction                                                                | PICO         |
| Moon et al. 2016 [64]     | Usefulness of non-flared intraductal fully covered metallic stent for refractory biliary strictures after living donor liver transplantation: Interim results of a prospective multicenter trial             | PICO         |
| Morita et al. 1992 [65]   | [Biliary endoprosthesis of malignant biliary obstruction using expandable metallic stent--preliminary clinical evaluation]                                                                                   | PICO         |
| Mukai et al. 2020 [66]    | Ways to improve stenting in unresectable malignant distal biliary obstruction: Stent design, intraductal placement, and protective role of an intact papilla?                                                | Study design |
| Nct. 2020 [67]            | Comparison Between Transpapillary and Suprapapillary Metal Stent                                                                                                                                             | Protocol     |
| Nct. 2020 [68]            | Intraintestinal Extended Biliary Stents Preventing Duodenobiliary Reflux in Patients With Biliary Stricture                                                                                                  | Protocol     |
| Park et al. 2014 [69]     | Intraductal placement of modified fully covered metallic stent for distal malignant biliary obstruction                                                                                                      | PICO         |
| Park et al. 2019 [70]     | Intraductal placement of non-flared fully covered metallic stent for refractory anastomotic biliary strictures after living donor liver transplantation: Long-term results of prospective multicenter trial  | PICO         |
| Pécsi et al. 2020 [71]    | Are Suprapapillary Biliary Stents Superior to Transpapillary Biliary Stents?                                                                                                                                 | Study design |
| Peixoto et al. 2017 [72]  | Degenerate intraductal papillary mucinous carcinoma with fish-mouth appearance of the papilla                                                                                                                | Study design |
| Sackmann et al. 2016 [73] | Bile duct stenosis: Diagnosis and management by endoscopy                                                                                                                                                    | Study design |
| Sandha et al. 2016 [74]   | Clinical utility of biliary metal stent use across a broad range of indications-interim results of a large prospective multi-centre Canadian registry                                                        | PICO         |
| Sasahira et al. 2012 [75] | Endoscopic management with inside stent for proximal benign biliary stricture after laparoscopic cholecystectomy                                                                                             | Study design |
| Sato et al. 2017 [76]     | Endoscopic treatment of biliary strictures after adult living donor liver transplantation with duct-to-duct reconstruction                                                                                   | Study design |
| Sato et al. 2019 [77]     | Long-term outcomes of endoscopic treatment for duct-to-duct anastomotic strictures after living donor liver transplantation                                                                                  | Study design |
| Shin et al. 2019 [78]     | Comparison of the clinical outcomes of suprapapillary and transpapillary stent insertion in unresectable cholangiocarcinoma with biliary obstruction                                                         | Duplicate    |
| Sung et al. 1992 [79]     | Ascending infection of the biliary tract after surgical sphincterotomy and biliary stenting                                                                                                                  | PICO         |

|                            |                                                                                                                                                                                                             |              |
|----------------------------|-------------------------------------------------------------------------------------------------------------------------------------------------------------------------------------------------------------|--------------|
| Takada et al. 2019 [80]    | THE EFFICACY OF SELF-EXPANDABLE METALLIC STENT PLACEMENT ABOVE THE PAPILLA IN THE PATIENTS WITH DISTAL MALIGNANT BILIARY OBSTRUCTION                                                                        | PICO         |
| Takahashi et al. 2017 [81] | Initial experience of endoscopic stent placement above the Oddi (inside-stent) for preoperative malignant biliary obstruction                                                                               | PICO         |
| Taniguchi et al 2018 [82]  | Intraductal versus transpapillary fully covered self-expandable metal stent placement for malignant biliary strictures                                                                                      | Duplicate    |
| Taniguchi et al 2019 [83]  | Intraductal vs. transpapillary fully covered metal stent placement for malignant biliary strictures                                                                                                         | Duplicate    |
| Walters et al. 1998 [84]   | Current role of endoscopic retrograde cholangiopancreatography in the management of benign pancreatic disease                                                                                               | Study design |
| Yamauchi et al. 2019 [85]  | Intraductal plastic stent placement is an effective therapy for unresectable malignant biliary obstruction                                                                                                  | Duplicate    |
| Yamauchi et al. 2016 [86]  | Intraductal plastic stent placement is an effective therapy for malignant biliary strictures                                                                                                                | Duplicate    |
| Yamauchi et al. 2018 [87]  | Temporary non-flared fully covered self-expandable metal stent placement for refractory benign choledochojejunal anastomotic stricture                                                                      | Study design |
| Yang et al. 2019 [88]      | Hepatobiliary and Pancreatic: Management of a benign bilio-enteric stricture by a novel covered stent with a long lasso                                                                                     | Study design |
| Yoo et al. 2020 [89]       | Intraductal placement of non-flared fully covered metallic stent for refractory anastomotic biliary strictures after living donor liver transplantation: Long-term results of prospective multicenter trial | PICO         |
| Zeissig et al. 2018 [90]   | Direct endoscopy and diagnosis of adenocarcinoma following metal stent-based drainage of a pancreatic cyst                                                                                                  | Study design |

**Table S2.** Summary of procedure-related complications and endoscopic sphincterotomy rate.

| Author, publication date<br>(patient number in supra-<br>/transpapillary group) | Survival<br>(supra- vs.<br>transpapillary)                                                  | Sphincterotomy (supra-<br>vs. transpapillary) | Procedure related<br>complications<br>(supra- vs. transpapillary)                                                      |
|---------------------------------------------------------------------------------|---------------------------------------------------------------------------------------------|-----------------------------------------------|------------------------------------------------------------------------------------------------------------------------|
| Brijbassie et al. 2015<br>(112 vs 83) [91]                                      | N/A                                                                                         | partial almost in all<br>cases vs 83          | bleeding: N/A<br>cholecystitis: N/A<br>cholangitis: 7 vs 6<br>pancreatitis: N/A<br>perforation: N/A                    |
| Cho et al. (abstract) 2013<br>(40 vs 44) [92]                                   | Mean: 221.8±171.1 vs<br>284±174.5 days (p=0.414)                                            | 0 vs 44                                       | bleeding: 0 vs 0<br>cholecystitis: 1 vs 2<br>cholangitis: 2 vs 2 (p=0.987)<br>pancreatitis: 0 vs 1<br>perforation: N/A |
| Cosgrove et al. 2016<br>(52 vs 120) [93]                                        | Median: 26 vs 29 weeks<br>(p= 0.49)                                                         | 5 vs 108                                      | bleeding: 0 vs 2<br>cholecystitis: N/A<br>cholangitis: 0 vs 1<br>pancreatitis: 0 vs 9 (p=0.059)<br>perforation: 1 vs 2 |
| Inatomi et al. 2013<br>(12 vs. 17) [94]                                         | N/A                                                                                         | In metal stents                               | bleeding: 0 vs 0<br>cholecystitis: N/A<br>cholangitis: N/A<br>pancreatitis: N/A<br>perforation: 0 vs 0                 |
| Kobayashi et al. 2015<br>(25 vs 32) [95]                                        | N/A                                                                                         | 3 vs 3                                        | bleeding: 1 vs. 0<br>cholecystitis: N/A<br>cholangitis: 0 vs. 0<br>pancreatitis: 1 vs. 4<br>perforation: N/A           |
| Kubota et al. 2016<br>(17 vs 23) [96]                                           | 24.8 vs. 20.4 months (p=<br>0.327)                                                          | 0 vs. 4                                       | bleeding: N/A<br>cholecystitis: N/A<br>cholangitis: 7 vs 20<br>pancreatitis: 2 vs 1<br>perforation: N/A                |
| Lee et al. 2018 (abstract) (27 vs 29)<br>[97]                                   | N/A                                                                                         | N/A                                           | N/A                                                                                                                    |
| Pedersen et al. 1998<br>(17 vs 17) [98]                                         | Median (IQR): 144 (82-<br>347) vs<br>46 (35-155) days                                       | 0 vs. 0                                       | bleeding: 0 vs 0<br>cholecystitis: 0 vs 0<br>cholangitis: 1 vs 3<br>pancreatitis: 0 vs 0<br>perforation: 0 vs 0        |
| Shin et al. 2020<br>(44 vs 29) [99]                                             | Cumulative patient<br>survival at 1, 6, 12<br>months: 91% vs 90%,<br>43% vs 35%, 11% vs 17% | 44 vs 29                                      | bleeding: N/A<br>cholecystitis: 2 vs 0<br>cholangitis: 6 vs 5<br>pancreatitis: 0 vs 2<br>perforation: N/A              |
| Takada et al. 2020<br>(30 vs 43) [100]                                          | Median: 269 days vs 302<br>days (p= 0.891)                                                  | 10 vs 12                                      | bleeding: N/A<br>cholecystitis: 0 vs 2<br>cholangitis: N/A                                                             |

|                                                          |     |         |                                                                                                                   |
|----------------------------------------------------------|-----|---------|-------------------------------------------------------------------------------------------------------------------|
|                                                          |     |         | pancreatitis: N/A<br>perforation: N/A                                                                             |
| <b>Taniguchi et al. 2020 (abstract) (38 vs 58) [101]</b> | N/A | N/A     | N/A                                                                                                               |
| <b>Uchida et al. 2005 (16 vs 16) [102]</b>               | N/A | 2 vs. 1 | bleeding: 0 vs. 0<br>cholecystitis: 0 vs 0<br>cholangitis: 0 vs 0<br>pancreatitis: 0 vs 0<br>perforation: 0 vs. 0 |
| <b>Yamaguchi et al. 2019 (abstract) (40 vs 46) [103]</b> | N/A | N/A     | bleeding: 0 vs. 0<br>cholecystitis: 3 vs N/A<br>cholangitis: 0 vs 0<br>pancreatitis: 0 vs 0<br>perforation: N/A   |

N/A: not available.

**Table S3.** Summary of findings table comprising the level of evidence for stent patency, stent migration, post-ERCP cholangitis, and pancreatitis.

| Outcomes                                 | Anticipated absolute effects* (95% CI) |                                          | Relative effect (95% CI) | No of participants (studies)                        | Certainty of the evidence (GRADE) | Comments                                                                                                                                     |
|------------------------------------------|----------------------------------------|------------------------------------------|--------------------------|-----------------------------------------------------|-----------------------------------|----------------------------------------------------------------------------------------------------------------------------------------------|
|                                          | Risk with transpapillary stent         | Risk with suprapapillary stent           |                          |                                                     |                                   |                                                                                                                                              |
| Patency assessed with: WMD               |                                        | WMD 47.2 more (18.75 more to 75.64 more) | -                        | 971 (11 observational studies) [91-96, 98-100, 102] | ⊕⊕○○ Low                          | Suprapapillary biliary stent was associated with longer stent patency.                                                                       |
| Stent migration assessed with: OR        | 10 per 100                             | 7 per 100 (2 to 25)                      | OR 0.66 (0.15 to 2.94)   | 376 (7 observational studies) [92, 95-98, 100, 102] | ⊕○○○ Very low                     | No significant difference appeared concerning the stent migration between the suprapapillary and transpapillary stent positions.             |
| Post-ERCP cholangitis assessed with: OR  | 12 per 100                             | 6 per 100 (3 to 13)                      | OR 0.52 (0.25 to 1.10)   | 598 (6 observational studies) [91-93, 96, 98, 99]   | ⊕○○○ Very low                     | No significant difference appeared concerning the post-ERCP cholangitis rate between the suprapapillary and transpapillary stent positions.  |
| Post-ERCP pancreatitis assessed with: OR | 7 per 100                              | 3 per 100 (1 to 9)                       | OR 0.38 (0.11 to 1.28)   | 426 (5 observational studies) [92, 93, 95, 96, 99]  | ⊕○○○ Very low                     | No significant difference appeared concerning the post-ERCP pancreatitis rate between the suprapapillary and transpapillary stent positions. |

\*The risk in the intervention group (and its 95% confidence interval) is based on the assumed risk in the comparison group and the relative effect of the intervention (and its 95% CI). WMD: weighted mean difference; CI: confidence interval; OR: odds ratio.

**Table S4.** Summary of findings table comprising the level of evidence for the subgroup of metal stents.

| Outcomes                                       | Anticipated absolute effects*<br>(95% CI) |                                                          | Relative effect<br>(95% CI) | No of participants<br>(studies)                         | Certainty of<br>the evidence<br>(GRADE) | Comments                                                                                                                                                   |
|------------------------------------------------|-------------------------------------------|----------------------------------------------------------|-----------------------------|---------------------------------------------------------|-----------------------------------------|------------------------------------------------------------------------------------------------------------------------------------------------------------|
|                                                | Risk with<br>transpapil-<br>lary stent    | Risk with su-<br>prapapillary<br>stent                   |                             |                                                         |                                         |                                                                                                                                                            |
| Patency<br>assessed with:<br>WMD               |                                           | WMD 10.18<br>days more<br>(38.83 fewer to<br>59.18 more) | -                           | 597<br>(5 observational<br>studies) [91-93, 99,<br>100] | ⊕○○○<br>Very low                        | No significant difference<br>appeared concerning the stent<br>patency between the<br>suprapapillary and<br>transpapillary stent positions.                 |
| Post-ERCP<br>cholangitis<br>assessed with: OR  | 5 per 100                                 | 4 per 100<br>(2 to 9)                                    | OR 0.85<br>(0.40 to 1.81)   | 524<br>(4 observational<br>studies) [91-93, 99]         | ⊕○○○<br>Very low                        | No significant difference<br>appeared concerning the rate of<br>post-ERCP cholangitis between<br>the suprapapillary and<br>transpapillary stent positions. |
| Post-ERCP<br>pancreatitis<br>assessed with: OR | 6 per 100                                 | 1 per 100<br>(0 to 6)                                    | OR 0.16<br>(0.03 to 0.95)   | 329<br>(3 observational<br>studies) [92, 93, 99]        | ⊕○○○<br>Very low                        | Significantly lower rate of post-<br>ERCP pancreatitis appeared in<br>the suprapapillary stent position<br>group.                                          |

\*The risk in the intervention group (and its 95% confidence interval) is based on the assumed risk in the comparison group and the relative effect of the intervention (and its 95% CI). WMD: weighted mean difference; CI: confidence interval; OR: odds ratio.



**Table S5.** Summary of findings table comprising the level of evidence for the subgroup of plastic stents.

| Outcomes                             | Anticipated absolute effects*<br>(95% CI) |                                                                  | Relative effect<br>(95% CI) | No of participants<br>(studies)                              | Certainty of<br>the evidence<br>(GRADE) | Comments                                                                                                                                     |
|--------------------------------------|-------------------------------------------|------------------------------------------------------------------|-----------------------------|--------------------------------------------------------------|-----------------------------------------|----------------------------------------------------------------------------------------------------------------------------------------------|
|                                      | Risk with<br>transpapil-<br>lary stent    | Risk with su-<br>prapapillary<br>stent                           |                             |                                                              |                                         |                                                                                                                                              |
| Patency<br>assessed with:<br>WMD     |                                           | <b>WMD 78.45<br/>days more</b><br>(41.42 more to<br>115.47 more) | -                           | 278<br>(6 observational<br>studies) [94-96, 98,<br>102, 103] | ⊕○○○<br>Very low                        | Suprapapillary biliary stent<br>was associated with longer<br>stent patency.                                                                 |
| Stent migration<br>assessed with: OR | 11 per 100                                | <b>17 per 100</b><br>(3 to 60)                                   | OR 1.57<br>(0.22 to 11.47)  | 163<br>(4 observational<br>studies) [95, 96, 98,<br>102]     | ⊕○○○<br>Very low                        | No significant difference<br>appeared concerning the stent<br>migration between the<br>suprapapillary and<br>transpapillary stent positions. |

\***The risk in the intervention group** (and its 95% confidence interval) is based on the assumed risk in the comparison group and the **relative effect** of the intervention (and its 95% CI). WMD: weighted mean difference; **CI**: confidence interval; **OR**: odds ratio.

**Table S6.** Summary of findings table comprising the level of evidence for the subgroup of full text included.

| Outcomes                                 | Anticipated absolute effects* (95% CI) |                                                | Relative effect (95% CI) | No of participants (studies)                       | Certainty of the evidence (GRADE) | Comments                                                                                                                                     |
|------------------------------------------|----------------------------------------|------------------------------------------------|--------------------------|----------------------------------------------------|-----------------------------------|----------------------------------------------------------------------------------------------------------------------------------------------|
|                                          | Risk with transpapillary stent         | Risk with suprapapillary stent                 |                          |                                                    |                                   |                                                                                                                                              |
| Patency assessed with: WMD               |                                        | WMD 60.74 days more (14.1 more to 107.38 more) | -                        | 510 (8 observational studies) [93-96, 98-100, 102] | ⊕⊕○○ Low                          | Suprapapillary biliary stent was associated with longer stent patency.                                                                       |
| Post-ERCP cholangitis assessed with: OR  | 15 per 100                             | 6 per 100 (2 to 15)                            | OR 0.34 (0.12 to 0.99)   | 319 (4 observational studies) [93, 96, 98, 99]     | ⊕○○○ Very low                     | Significantly lower rate of post-ERCP cholangitis appeared in the suprapapillary stent position group.                                       |
| Post-ERCP pancreatitis assessed with: OR | 8 per 100                              | 3 per 100 (1 to 13)                            | OR 0.37 (0.08 to 1.69)   | 342 (4 observational studies) [93, 95, 96, 99]     | ⊕○○○ Very low                     | No significant difference appeared concerning the post-ERCP pancreatitis rate between the suprapapillary and transpapillary stent positions. |

\*The risk in the intervention group (and its 95% confidence interval) is based on the assumed risk in the comparison group and the relative effect of the intervention (and its 95% CI). WMD: weighted mean difference; CI: confidence interval; OR: odds ratio.

## Figures

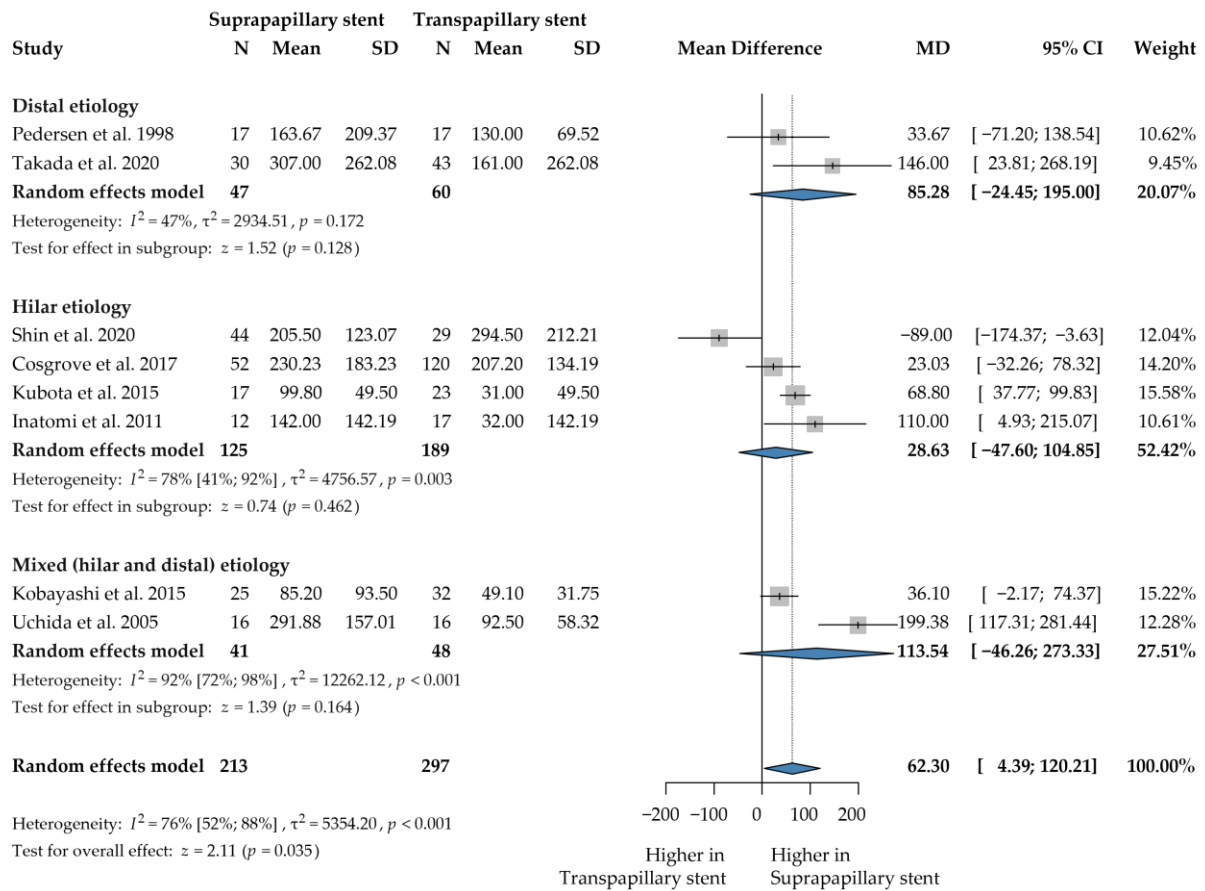

**Figure S1.** Forest plot comparing stent patency time between suprapapillary and transpapillary stents, including full texts with malignant indications. WMD: weighted mean difference; p: P-value; CI: confidence interval; I-squared:  $I^2$ . Unit of measurement: day. [93-96, 98-100, 102]

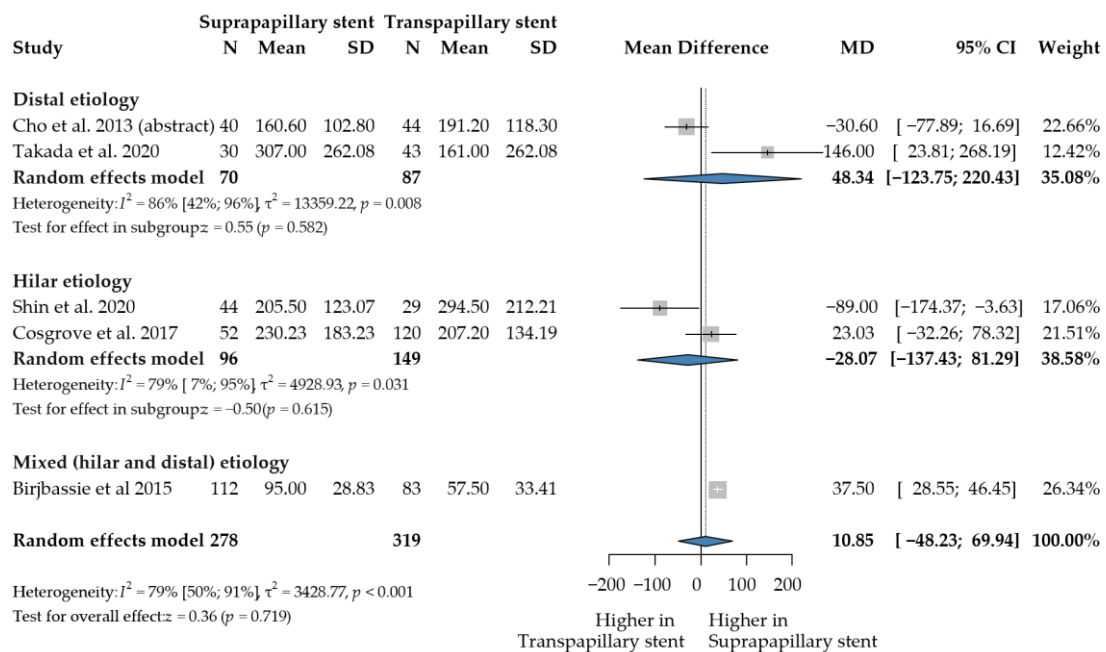

**Figure S2.** Forest plot comparing stent patency time between suprapapillary and transpapillary metal stents. WMD: weighted mean difference; p: P-value; CI: confidence interval; I-squared:  $I^2$ . Unit of measurements: day. [91-93, 99, 100]

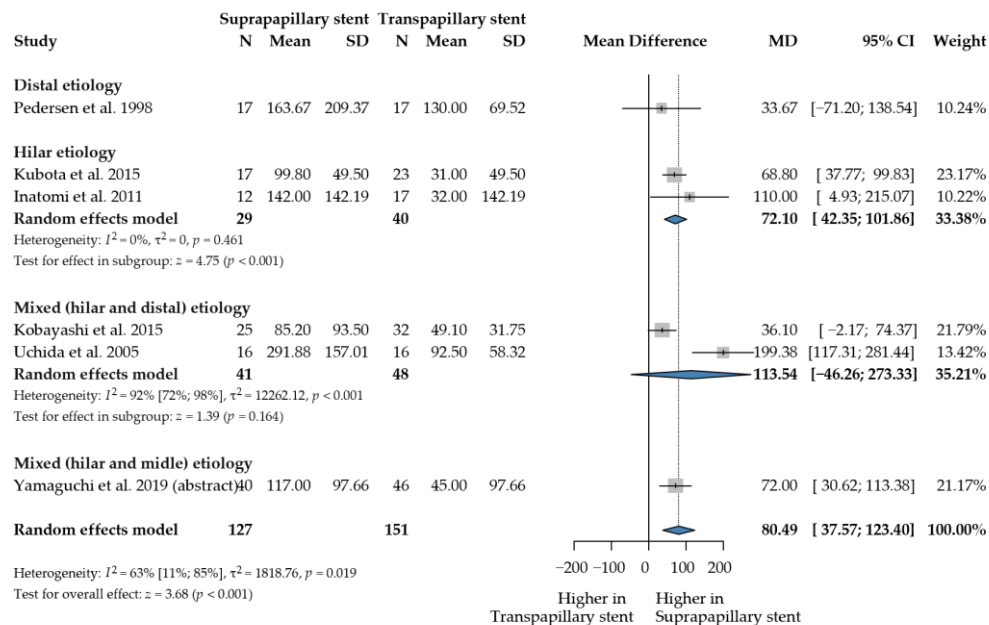

**Figure S3.** Forest plot comparing stent patency time between suprapapillary and transpapillary plastic stents. WMD: weighted mean difference; p: P-value; CI: confidence interval; I-squared:  $I^2$ . Unit of measurement: day. [94-96, 98, 102, 103]

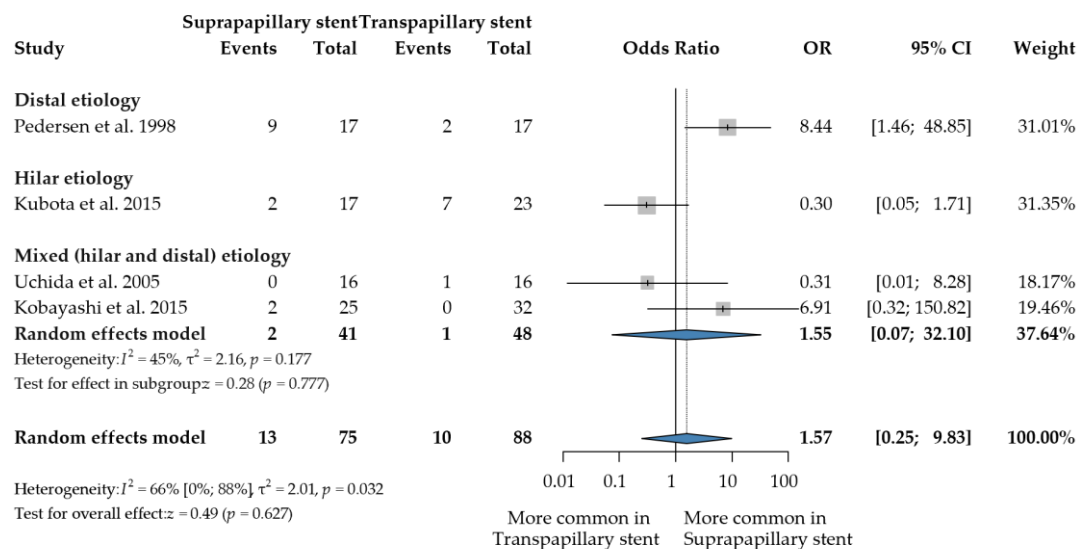

**Figure S4.** Forest plot comparing stent migration rate between suprapapillary and transpapillary plastic stents. OR: odds ratio, p: P-value; CI: confidence interval; I-squared:  $I^2$ . [95, 96, 98, 102]

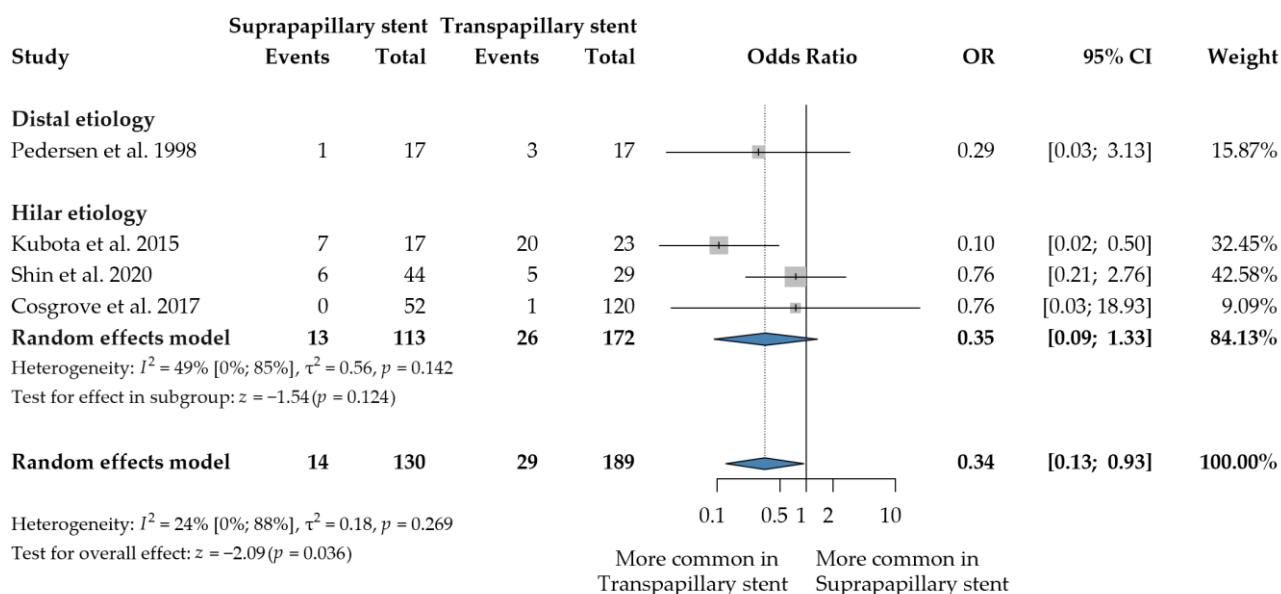

**Figure S5.** Forest plot comparing cholangitis rate between suprapapillary and transpapillary stents, including full texts with malignant indications. OR: odds ratio, p: P-value; CI: confidence interval; I-squared:  $I^2$ . [93, 96, 98, 99]

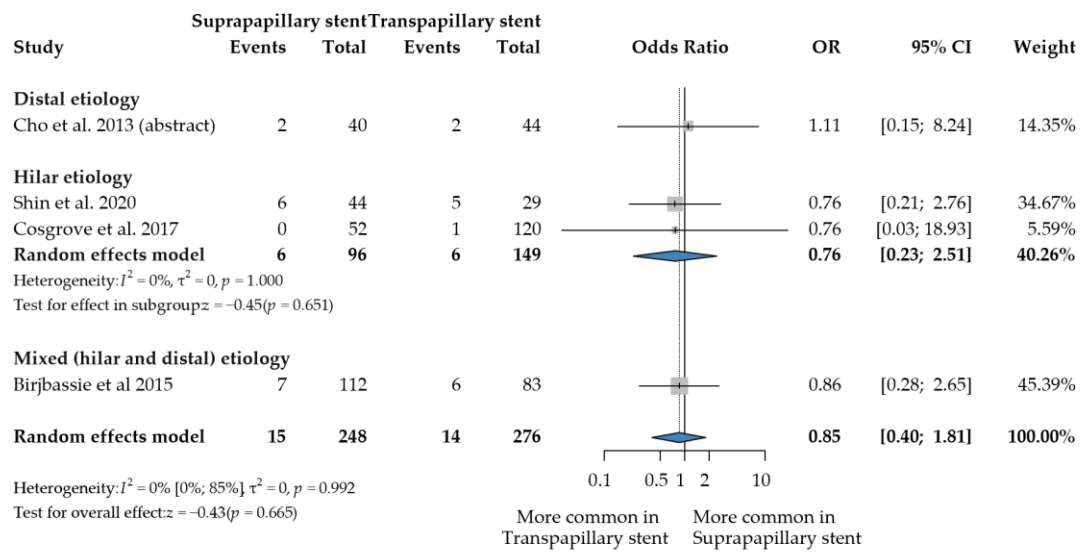

**Figure S6.** Forest plot comparing cholangitis rate between suprapapillary and transpapillary metal stents. OR: odds ratio, p: P-value; CI: confidence interval; I-squared:  $I^2$ . [91-93, 99]

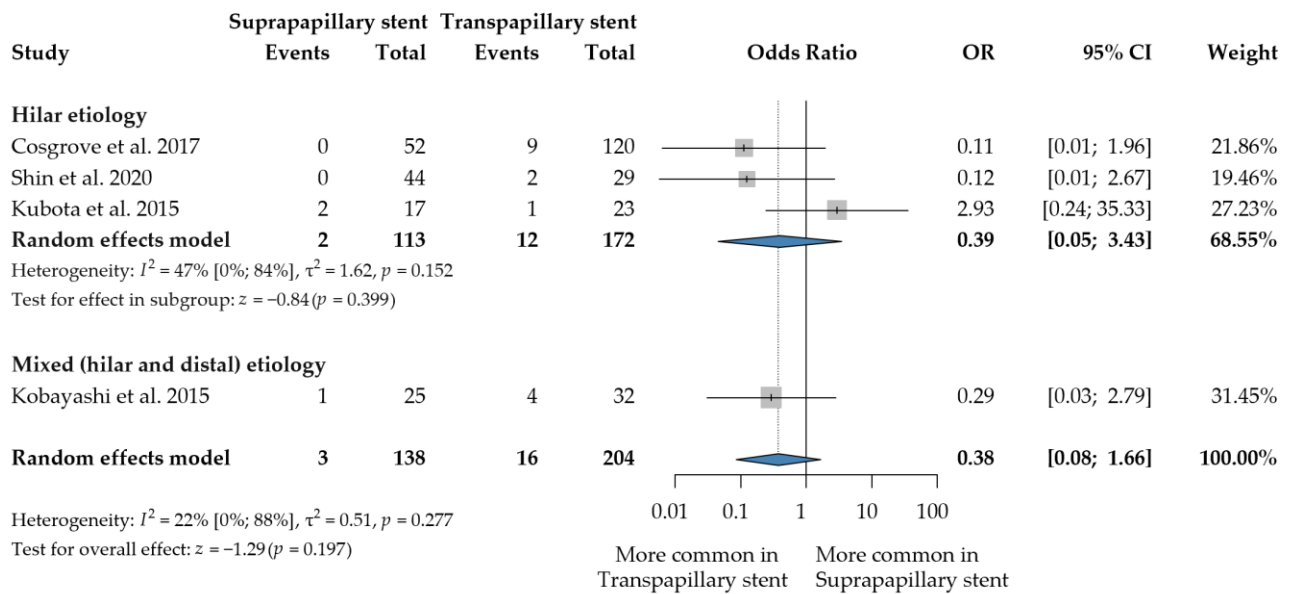

**Figure S7.** Forest plot comparing pancreatitis rate between suprapapillary and transpapillary stents including full texts. OR: odds ratio, p: P-value; CI: confidence interval; I-squared:  $I^2$ . [93, 95, 96, 99]

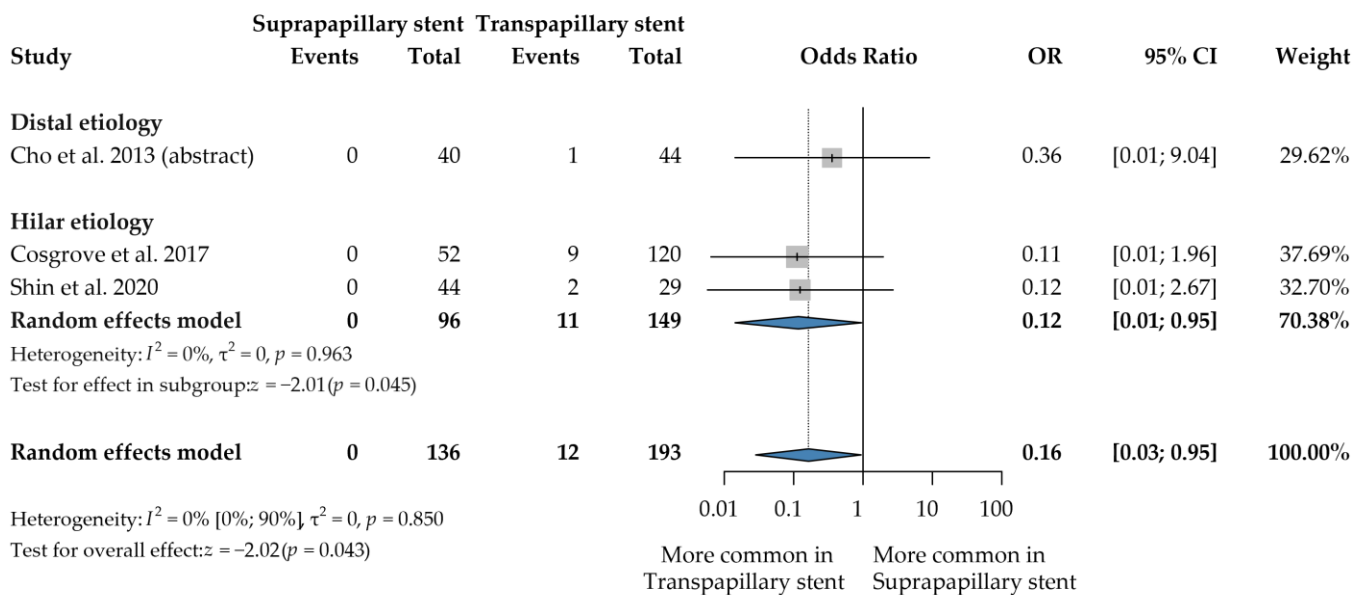

**Figure S8.** Forest plot comparing pancreatitis rate between suprapapillary and transpapillary metal stents. OR: odds ratio, p: P-value; CI: confidence interval; I-squared:  $I^2$ . [92, 93, 99]

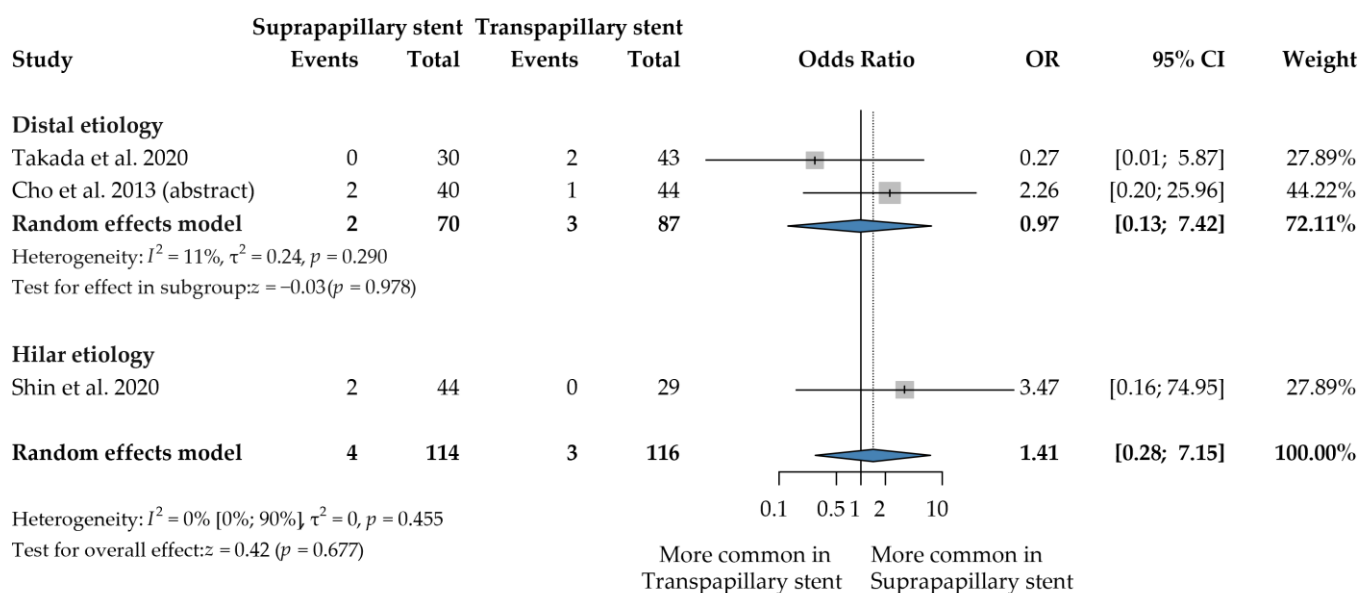

**Figure S9.** Forest plot comparing cholecystitis rate between suprapapillary and transpapillary metal stents. OR: odds ratio, p: P value; CI: confidence interval; I-squared:  $I^2$ . [92, 99, 100]

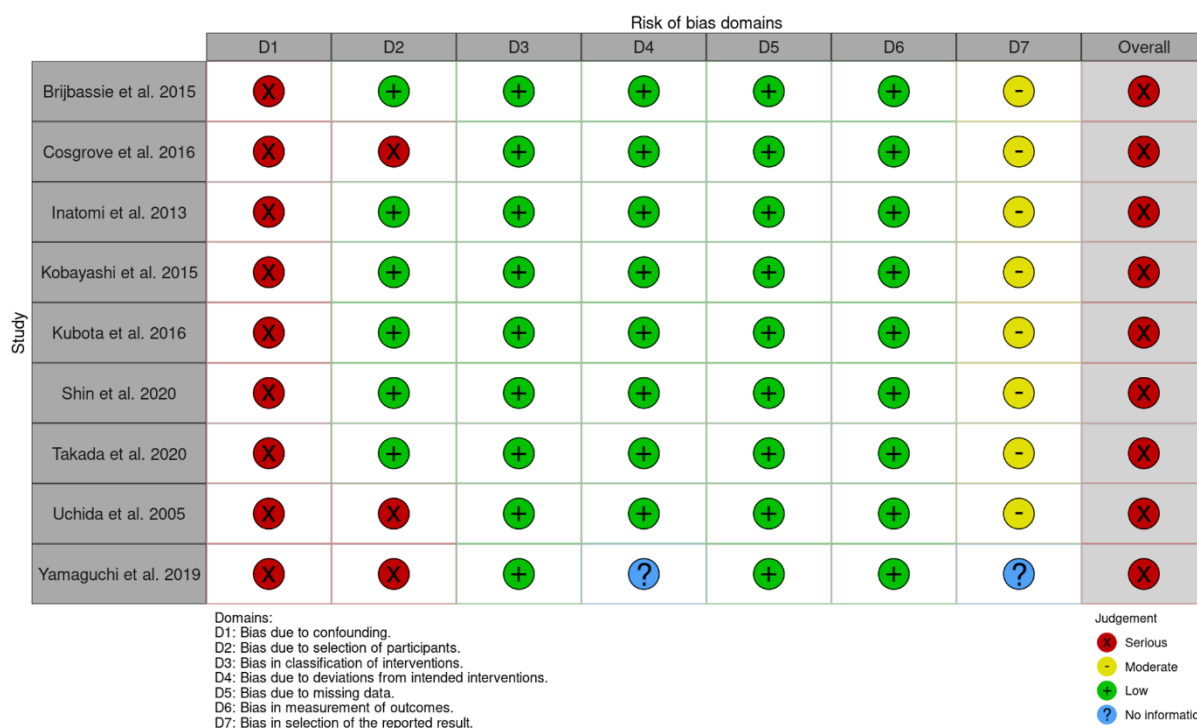

**Figure S10.** Risk of Bias Assessment (study-level judgments) in observational studies with the Risk Of Bias In Non-Randomized Studies - of Interventions (ROBINS-I). Outcome: Stent patency time. [91, 93-96, 99, 100, 102, 103]



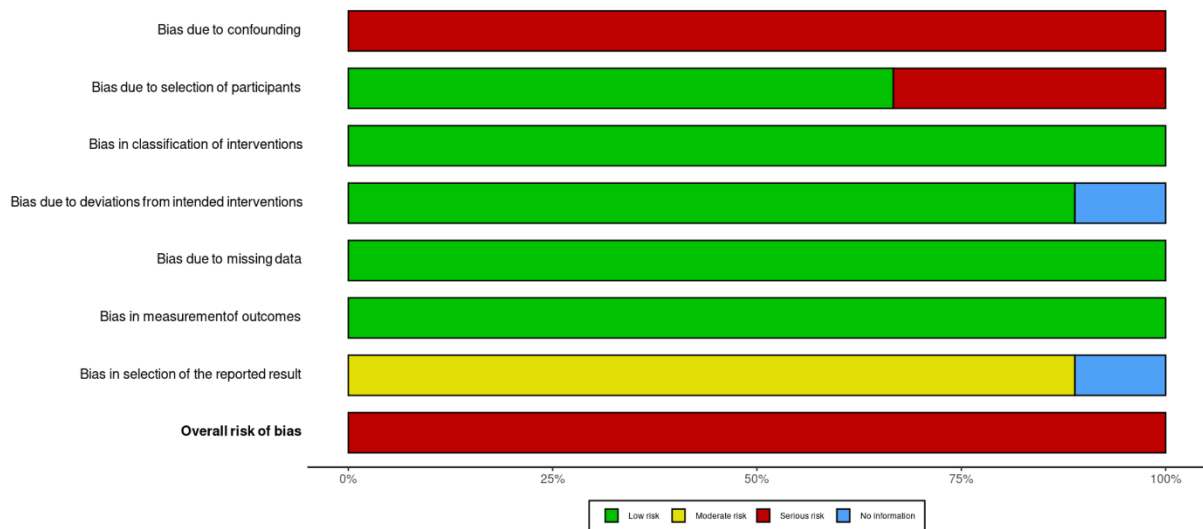

**Figure S11.** Risk of bias assessment (domain-level judgments) in observational studies with the Risk Of Bias In Non-Randomized Studies - of Interventions (ROBINS-I). Outcome: Stent patency time.[91, 93-96, 99, 100, 102, 103]

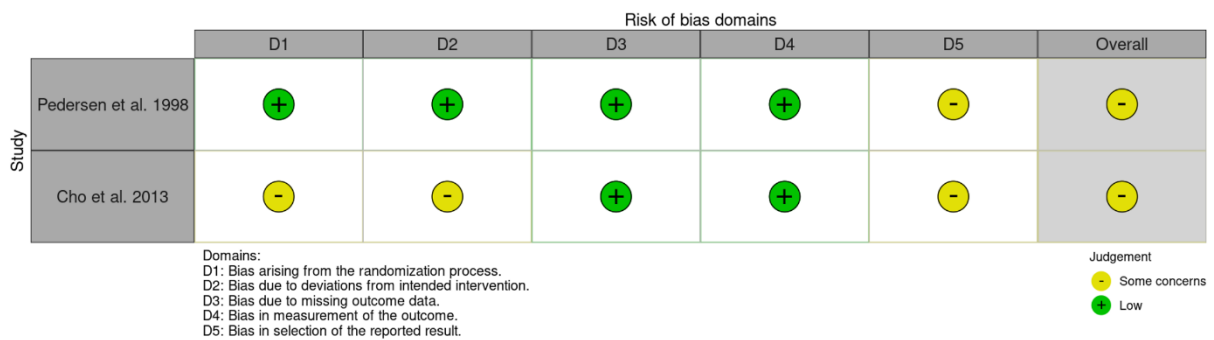

**Figure S12.** Risk of Bias Assessment (study-level judgments) with version 2 of the Cochrane risk-of-bias tool for randomized trials (RoB 2). Outcome: Stent patency time. [92, 98]

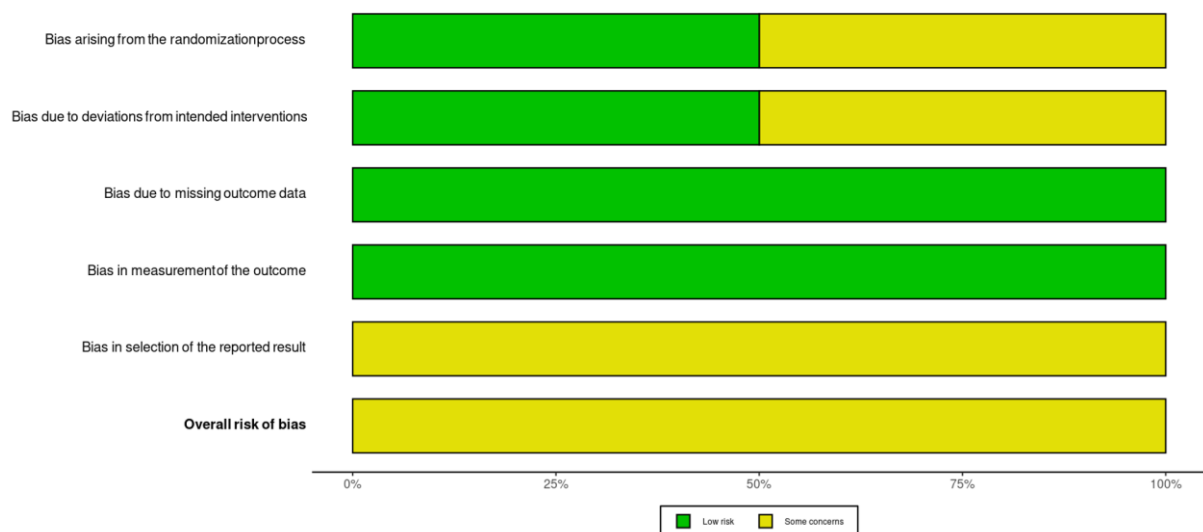

**Figure S13.** Risk of bias assessment (domain-level judgments) with version 2 of the Cochrane Risk-of-Bias tool for randomized trials (RoB 2). Outcome: Stent patency time. [92, 98]

| Study                 | Risk of bias domains |    |    |    |    |    |    | Overall |
|-----------------------|----------------------|----|----|----|----|----|----|---------|
|                       | D1                   | D2 | D3 | D4 | D5 | D6 | D7 |         |
| Kobayashi et al. 2015 | ✗                    | +  | +  | +  | +  | +  | -  | ✗       |
| Kubota et al. 2016    | ✗                    | +  | +  | +  | +  | +  | -  | ✗       |
| Takada et al. 2020    | ✗                    | +  | +  | +  | +  | +  | -  | ✗       |
| Uchida et al. 2005    | ✗                    | ✗  | +  | +  | +  | +  | -  | ✗       |
| Lee et al. 2018       | ✗                    | +  | +  | ?  | +  | +  | ?  | ✗       |

Domains:  
D1: Bias due to confounding.  
D2: Bias due to selection of participants.  
D3: Bias in classification of interventions.  
D4: Bias due to deviations from intended interventions.  
D5: Bias due to missing data.  
D6: Bias in measurement of outcomes.  
D7: Bias in selection of the reported result.

Judgement  
✗ Serious  
- Moderate  
+ Low  
? No information

**Figure S14.** Risk of Bias Assessment (study-level judgments) in observational studies with the Risk Of Bias In Non-Randomized Studies - of Interventions (ROBINS-I). Outcome: Stent stent migration. [95-97, 100, 102]

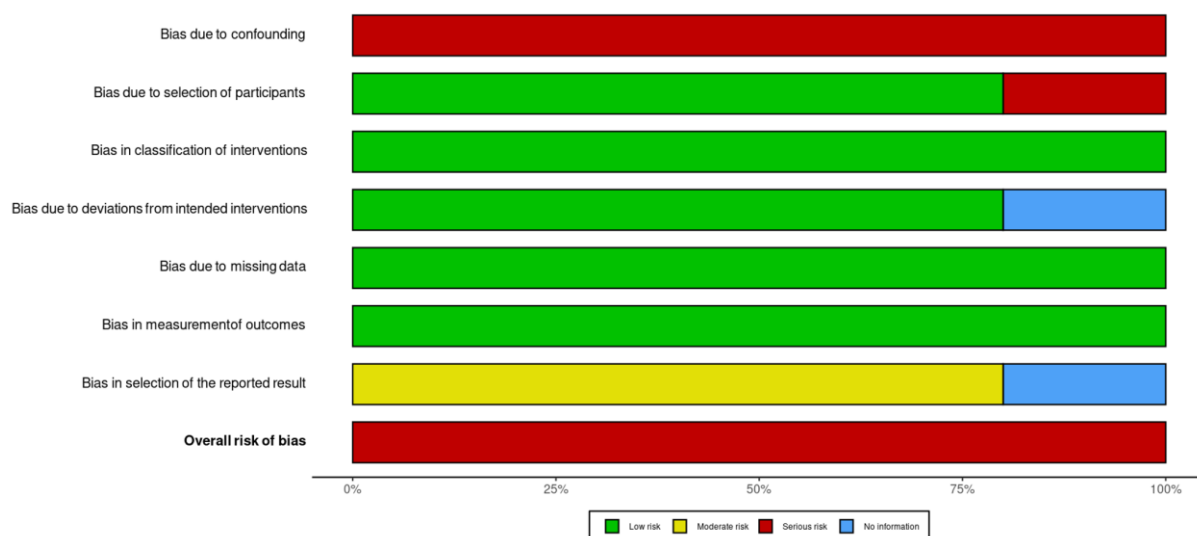

**Figure S15.** Risk of bias assessment (domain-level judgments) in observational studies with the Risk Of Bias In Non-Randomized Studies - of Interventions (ROBINS-I). Outcome: Stent stent migration. [95-97, 100, 102]

| Study                | Risk of bias domains                                                              |                                                                                   |                                                                                   |                                                                                   |                                                                                     | Overall                                                                             |
|----------------------|-----------------------------------------------------------------------------------|-----------------------------------------------------------------------------------|-----------------------------------------------------------------------------------|-----------------------------------------------------------------------------------|-------------------------------------------------------------------------------------|-------------------------------------------------------------------------------------|
|                      | D1                                                                                | D2                                                                                | D3                                                                                | D4                                                                                | D5                                                                                  |                                                                                     |
| Pedersen et al. 1998 |  |  |  |  |  |  |
| Cho et al. 2013      |  |  |  |  |  |  |

Domains:  
D1: Bias arising from the randomization process.  
D2: Bias due to deviations from intended intervention.  
D3: Bias due to missing outcome data.  
D4: Bias in measurement of the outcome.  
D5: Bias in selection of the reported result.

Judgement  
 Some concerns  
 Low

**Figure S16.** Risk of Bias Assessment (study-level judgments) with version 2 of the Cochrane Risk-of-Bias tool for randomized trials (RoB 2). Outcome: Stent stent migration. [92, 98]

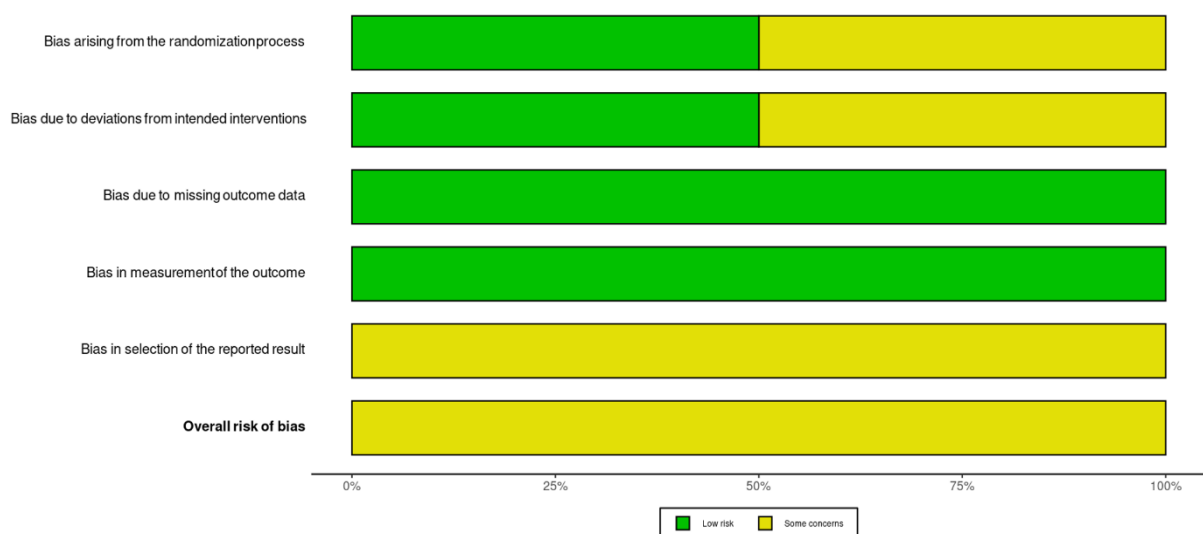

**Figure S17.** Risk of bias assessment (domain-level judgments) with version 2 of the Cochrane Risk-of-Bias tool for randomized trials (RoB 2). Outcome: Stent stent migration. [92, 98]

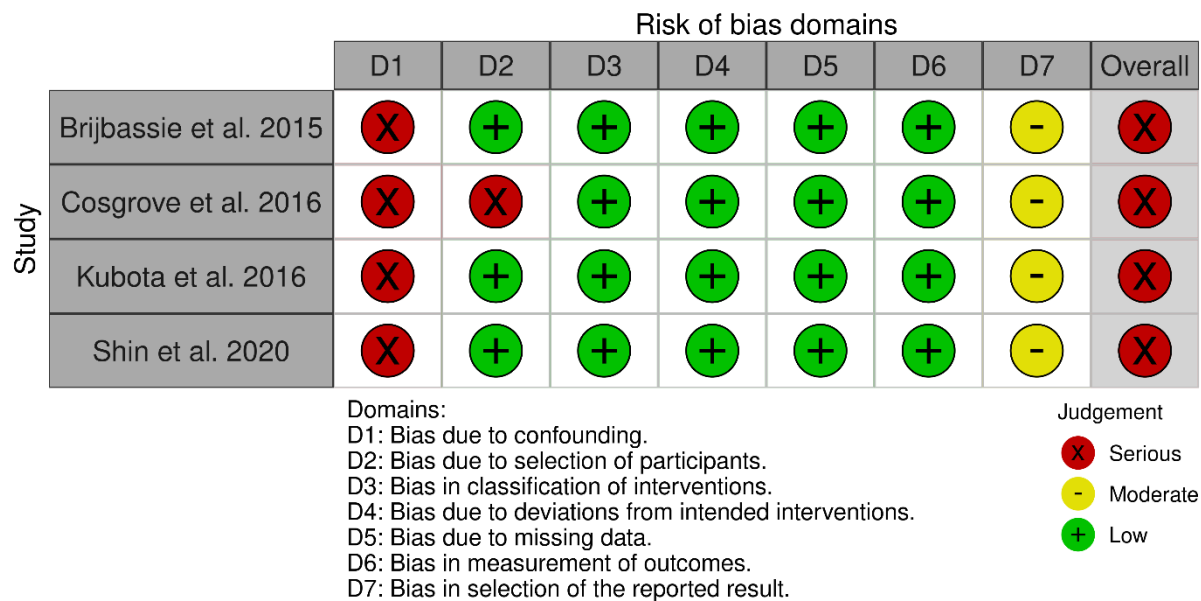

**Figure S18.** Risk of Bias Assessment (study-level judgments) in observational studies with the Risk Of Bias In Non-Randomized Studies - of Interventions (ROBINS-I). Outcome: cholangitis. [91, 93, 96, 99]

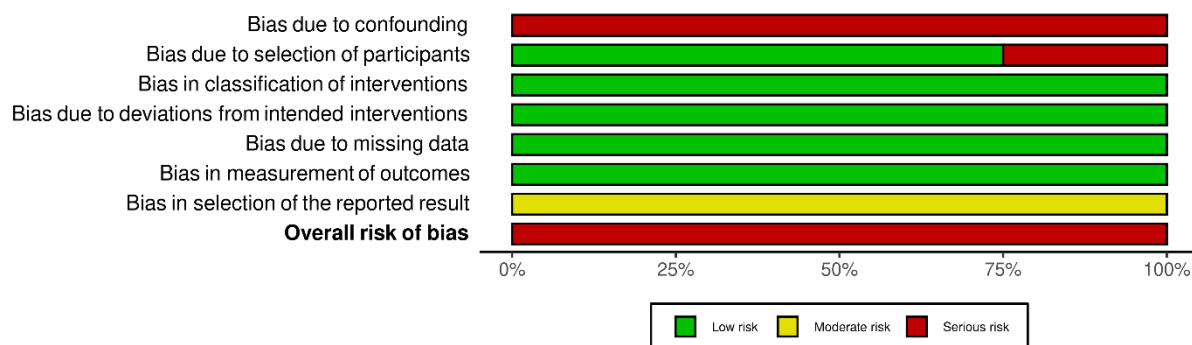

**Figure S19.** Risk of bias assessment (domain-level judgments) in observational studies with the Risk Of Bias In Non-Randomized Studies - of Interventions (ROBINS-I). Outcome: cholangitis. [91, 93, 96, 99]

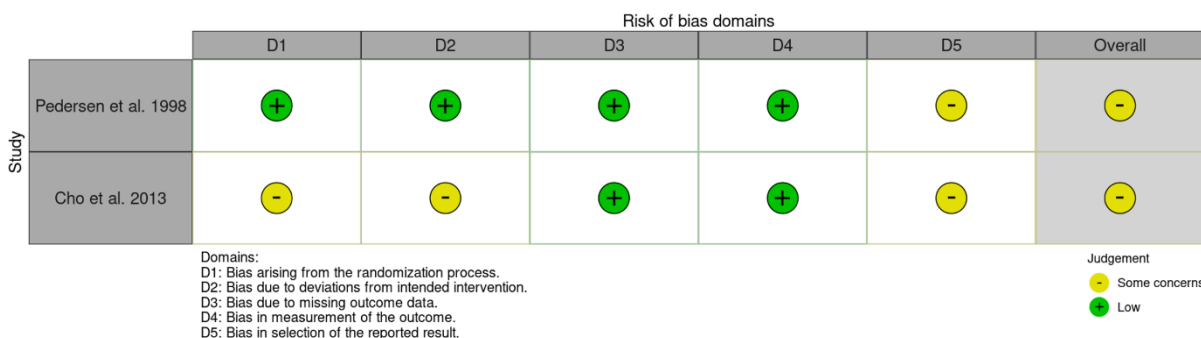

**Figure S20.** Risk of Bias Assessment (study-level judgments) with version 2 of the Cochrane Risk-of-Bias tool for randomized trials (RoB 2). Outcome: cholangitis. [92, 98]

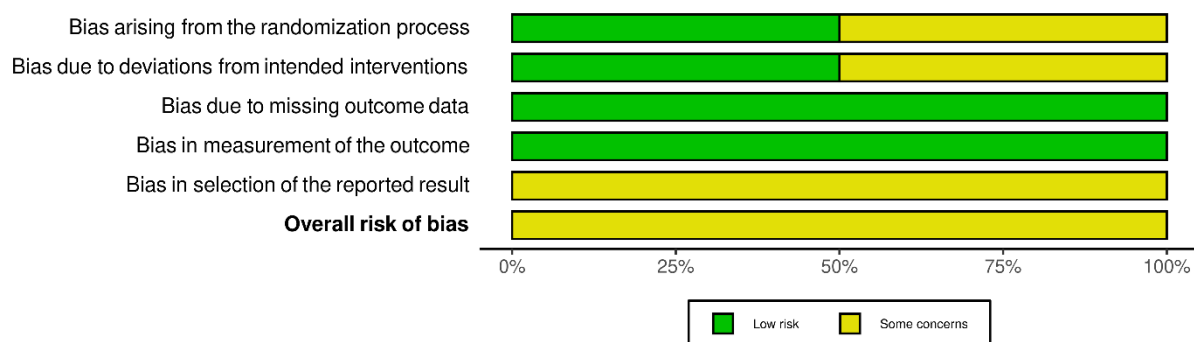

**Figure S21.** Risk of bias assessment (domain-level judgments) with version 2 of the Cochrane risk-of-bias tool for randomized trials (RoB 2). Outcome: cholangitis. [92, 98]

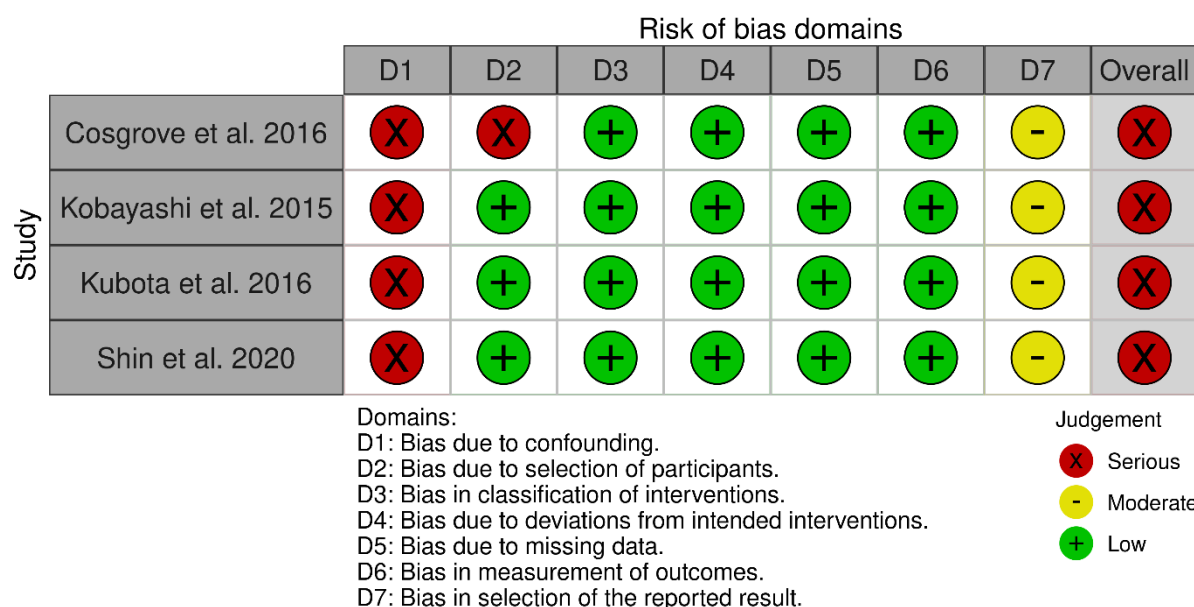

**Figure S22.** Risk of Bias Assessment (study-level judgments) in observational studies with the Risk Of Bias In Non-Randomized Studies - of Interventions (ROBINS-I). Outcome: pancreatitis. [93, 95, 96, 99]

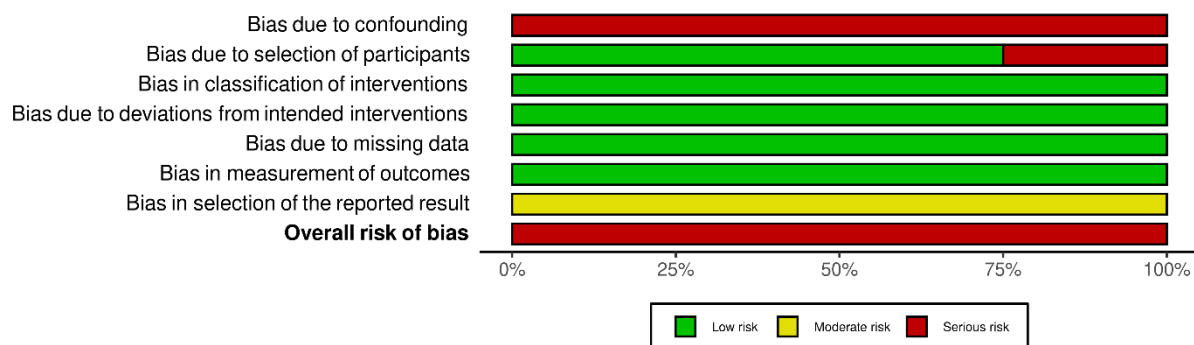

**Figure S23.** Risk of bias assessment (domain-level judgments) in observational studies with the Risk Of Bias In Non-Randomized Studies - of Interventions (ROBINS-I). Outcome: pancreatitis. [93, 95, 96, 99]

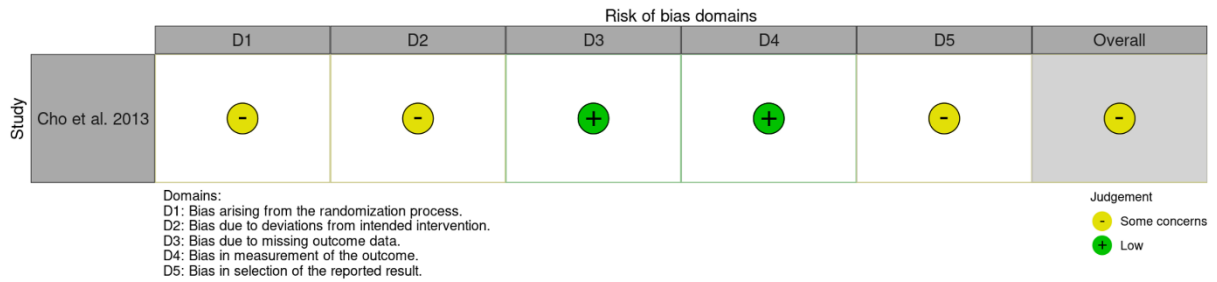

**Figure S24.** Risk of Bias Assessment (study-level judgments) with version 2 of the Cochrane Risk-of-Bias tool for randomized trials (RoB 2). Outcome: pancreatitis. [92]

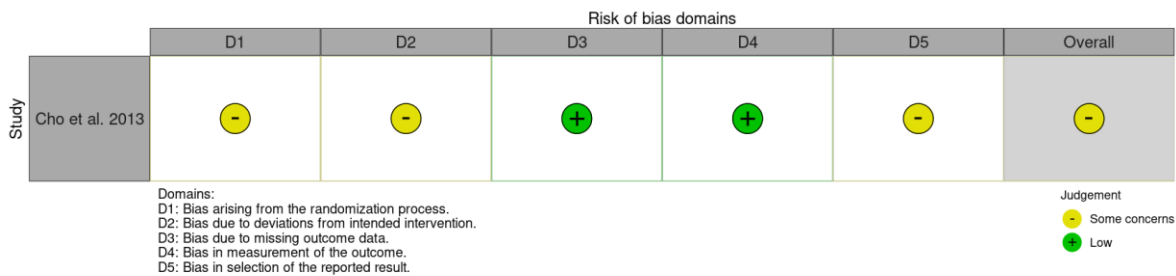

**Figure S25.** Risk of Bias Assessment (study-level judgments) with the version 2 of the Cochrane risk-of-bias tool for randomized trials (RoB 2). Outcome: Cholecystitis. [92]

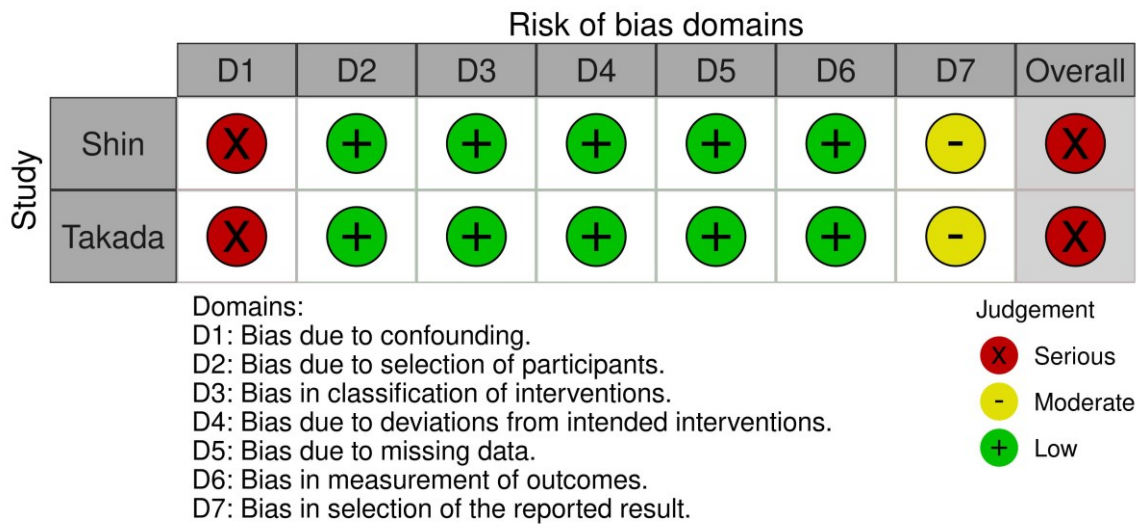

**Figure S26.** Risk of Bias Assessment (study-level judgments) with the Risk of Bias In Non-Randomized Studies - of Interventions (ROBINS-I). Outcome: Cholecystitis. [99, 100]

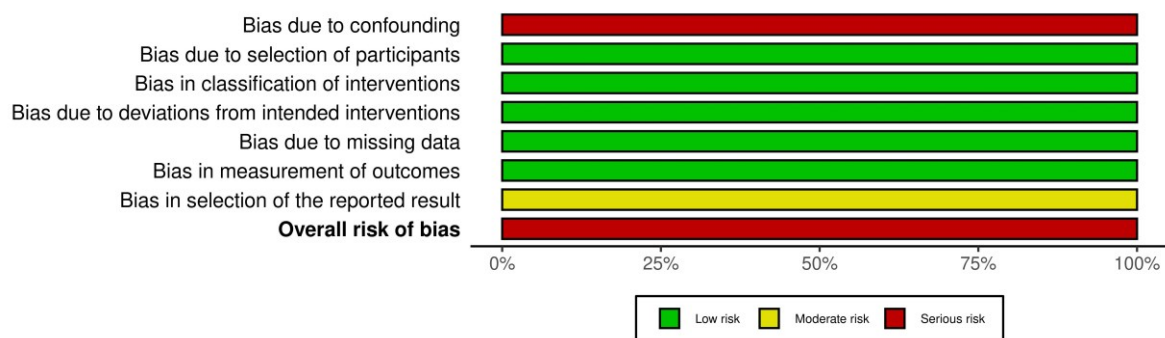

**Figure S27.** Risk of Bias Assessment (domain-level judgements) with the Risk of Bias In Non-Randomized Studies - of Interventions (ROBINS-I). Outcome: Cholecystitis. [99, 100]

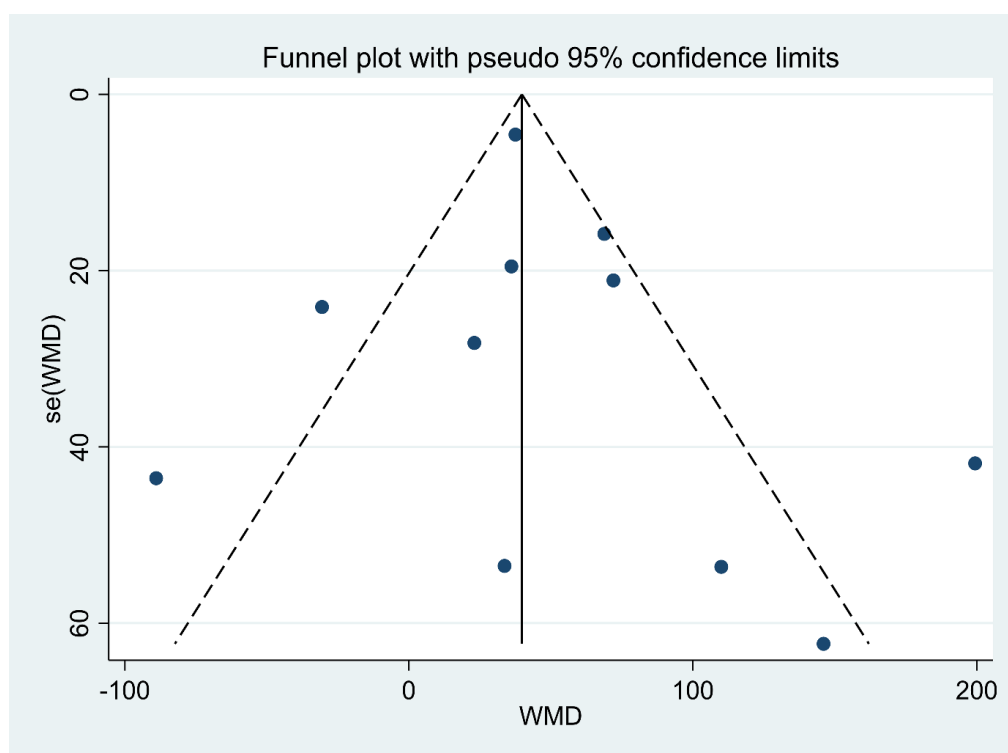

**Figure S28.** Funnel plot investigating publication bias for the outcome of stent patency (all included publications). Egger's test:  $p=0.591$ . [91-96, 98-100, 102, 103]

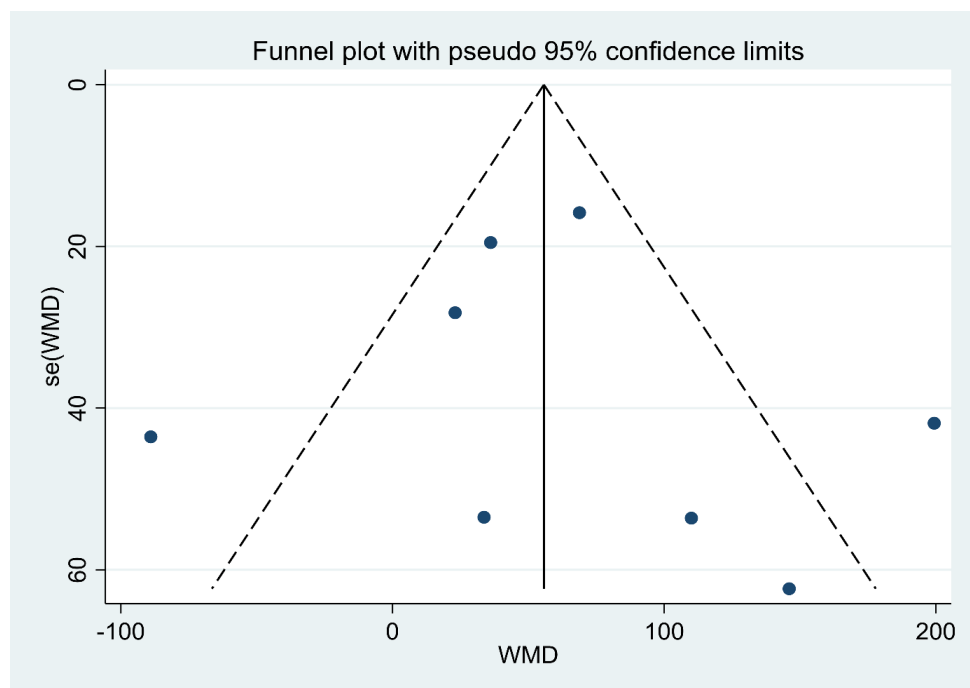

**Figure S29.** Funnel plot investigating publication bias for the outcome of stent patency (full-texts investigating malignant indication). [93-96, 98-100, 102]

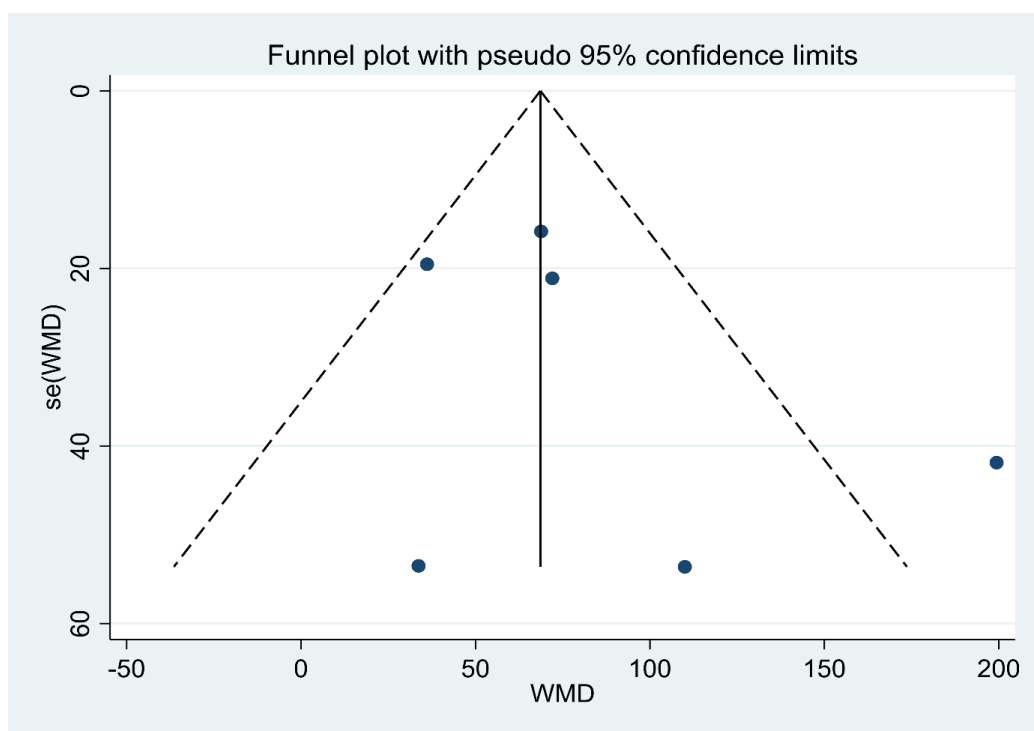

**Figure S30.** Funnel plot investigating publication bias for the outcome of stent patency (plastic stent). [94-96, 98, 102, 103]



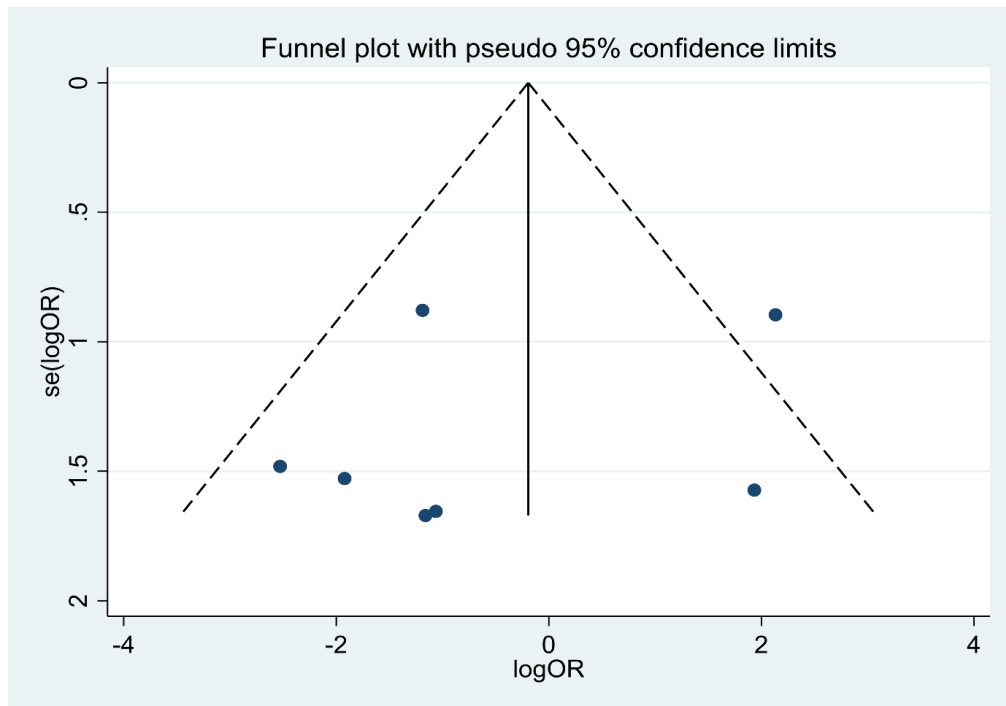

**Figure S31.** Funnel plot investigating publication bias for the outcome of stent migration rate (all publications). [92, 95-98, 100, 102]

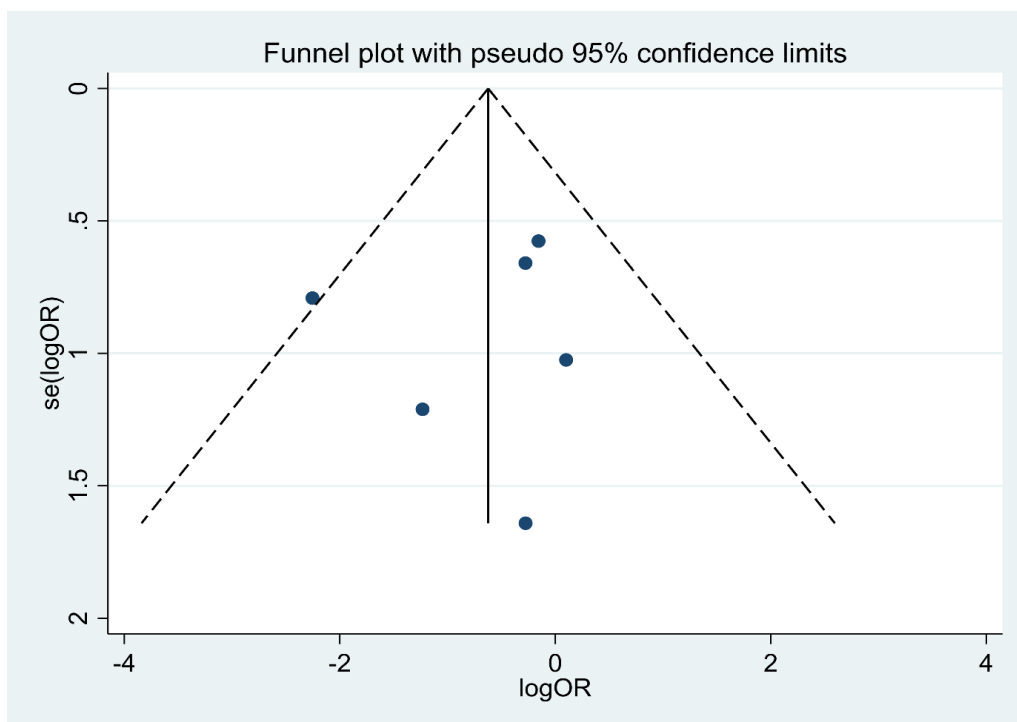

**Figure S32.** Funnel plot investigating publication bias for the outcome of post-ERCP cholangitis rate (all publications). [91-93, 96, 98, 99]

**References:**

1. Aepli P, St John A, Gupta S et al. Success and complications of an intra-ductal fully covered self-expanding metal stent (ID-FCSEMS) to treat anastomotic biliary strictures (AS) after orthotopic liver transplantation (OLT). *Surgical endoscopy* 2017; 31: 1558-1563. DOI: 10.1007/s00464-016-5138-9. Epub 2016 Aug 29.
2. Al-Kawas FH. Biliary access during endoscopic retrograde cholangiopancreatography: How to precut and a word of caution! *Journal of Gastroenterology and Hepatology (Australia)* 2005; 20: 805-806. DOI: 10.1111/j.1400-1746.2005.03847.x
3. Aljahdli E. Management of distal malignant biliary obstruction. *Saudi Journal of Gastroenterology* 2018; 24: 71-72. DOI: 10.4103/sjg.SJG\_611\_17
4. Barresi L, Ligresti D, Traina M. A Challenging Diagnosis for a Biliary Stricture. *Gastroenterology* 2016; 150: 1537-1539. DOI: 10.1053/j.gastro.2016.02.024
5. Bhalla S, Law R. Endoscopic Management of Acute Cholecystitis Following Metal Stent Placement for Malignant Biliary Strictures: A View from the Inside Looking in. *Clinical endoscopy* 2019; 52: 209-211. DOI: 10.5946/ce.2019.097. Epub 2019 May 23.
6. Brijbassie A, Wang A, Hammerle C et al. Transpapillary vs. intraductal fully covered selfexpanding metal stent placement for malignant and benign biliary disease: Does it make a difference? *Journal of Interventional Gastroenterology* 2015; 5: 64-67. DOI: 10.7178/jig.192
7. Chang JH, Lee IS, Chun HJ et al. Usefulness of the rendezvous technique for biliary stricture after adult right-lobe living-donor liver transplantation with duct-to-duct anastomosis. *Gut and liver* 2010; 4: 68-75. DOI: 10.5009/gnl.2010.4.1.68. Epub 2010 Mar 25.
8. Chang JH, Lee IS, Chun HJ et al. Comparative study of rendezvous techniques in post-liver transplant biliary stricture. *World Journal of Gastroenterology* 2012; 18: 5957-5964. DOI: 10.3748/wjg.v18.i41.5957
9. Chantarojanasiri T, Kogure H, Hamada T et al. Usefulness of stent placement above the papilla, so-called, 'inside stent'. *Gastrointestinal Intervention* 2018; 7: 52-56. DOI: 10.18528/gii180013
10. ChiCTR. Comparative study for the efficacy of intraductal RFA + biliary stent placement or intraductal Iodine-125 seed + biliary stent placement by percutaneous transhepatic cholangial drainage for treating the patients with unresectable malignant biliary strictures. <http://www.who.int/trialsearch/Trial2.aspx?TrialID=ChiCTR1900020722> 2019.
11. ChiCTR. Comparative study of the efficacy of intraductal RFA +stent placement by ERCP and percutaneous transhepatic approach in patients with unresectable malignant biliary strictures. <http://www.who.int/trialsearch/Trial2.aspx?TrialID=ChiCTR1900020693> 2019.
12. Choi S, Jun C, Cho E et al. Feasibility of self expandable metal stent for preservation of sphincter of Oddi function in patients with common bile duct stones a pilot study. *Hepatology International* 2015; 9: S153-S154. DOI: 10.1007/s12072-015-9609-1
13. Choi W, Shim HJ. Newly modified plastic stent for transhepatic placement above the sphincter of Oddi in treatment of biliary anastomotic stricture after liver transplantation: Preliminary report of 7 patient. *CardioVascular and Interventional Radiology* 2019; 42: S251. DOI: 10.1007/s00270-019-02282-x
14. Choi W, Hur J. Abstract No. 579 Newly modified plastic stent for transhepatic placement above the sphincter of Oddi in treatment of biliary anastomotic stricture after liver transplantation: preliminary report of seven patients. *Journal of Vascular and Interventional Radiology* 2020; 31: S253. DOI: 10.1016/j.jvir.2019.12.640
15. Dawwas MF, Oppong KW, Webster GJ. Endoscopic assessment and management of biliary strictures. *Frontline Gastroenterology* 2016; 7: 170-175. DOI: 10.1136/flgastro-2015-100570
16. Douhara A, Ogawa H, Ozutsumi T et al. Inside plastic stent is useful and safety for malignant biliary stenosis including Bismuth IV. *Journal of Gastroenterology and Hepatology (Australia)* 2016; 31: 343. DOI: 10.1111/jgh.13540
17. García-Cano J, Álvarez-Burneo L, Taberna-Arana L. Difficulties encountered for removing fully covered self-expanding metal stents inserted in benign biliary conditions. *United European Gastroenterology Journal* 2013; 1: A494. DOI: 10.1177/2050640613502900
18. Gargouri D, Kochlef A, Ouekaa A et al. [Biliary stent occlusion]. *La Tunisie medicale* 2010; 88: 462-466.
19. Hasegawa H, Inatomi O, Morita Y et al. Appropriate therapeutic strategy for biliary stenting using threaded inside stents based on the location of the malignant obstruction. *United European Gastroenterology Journal* 2014; 2: A464. DOI: 10.1177/2050640614548980
20. Hatzidakis AA, Tsetis D, Chrysou E et al. Nitinol stents for palliative treatment of malignant obstructive jaundice: Should we stent the sphincter of Oddi in every case? *CardioVascular and Interventional Radiology* 2001; 24: 245-248. DOI: 10.1007/s00270-001-0030-x
21. Hayasaka N, Hayashi T, Ono M et al. Endoscopic placement of a large-bore covered self-expandable metallic stent for cholangitis caused by mucus from a pancreatic mucinous neoplasm. *Endoscopy* 2014; 46: E634-E635. DOI: 10.1055/s-0034-1377948
22. Hayashi K, Ikarashi S, Kohisa J et al. Endoscopic management of unresectable malignant hilar strictures using threaded inside stents versus metallic stents. *Gastrointestinal Endoscopy* 2018; 87: AB208.
23. Hyodo T, Yamanaka T. Endoscopic metallic stenting and intraductal ultrasonography in a case of bile duct cancer. *Endoscopy* 1998; 30: S97-S98. DOI: 10.1055/s-2007-1001414
24. Inatomi O, Bamba S, Shiota M et al. The efficacy and safety of threaded biliary plastic "inside-stent" for malignant hilar obstruction. *Gastrointestinal Endoscopy* 2011; 73: AB354. DOI: 10.1016/j.gie.2011.03.762
25. Inoue T, Kitano R, Ito K et al. Double radiofrequency ablation with metal stent placement for refractory benign biliary and pancreatic duct strictures. *Journal of Gastrointestinal and Liver Diseases* 2020; 29: 144. DOI: 10.15403/jgld-896
26. Inoue T, Suzuki Y, Okumura F et al. Intraductal placement of a fully covered metal stent with a long string for distal malignant biliary obstruction without endoscopic sphincterotomy: Prospective multi-center feasibility study. *Digestive endoscopy* :

- 
- official journal of the Japan Gastroenterological Endoscopy Society 2020; 32: 949-956. DOI: 10.1111/den.13614. Epub 2020 Mar 12.
27. Ishiwatari H, Hayashi T, Ono M et al. Newly designed plastic stent for endoscopic placement above the sphincter of Oddi in patients with malignant hilar biliary obstruction. *Digestive endoscopy : official journal of the Japan Gastroenterological Endoscopy Society* 2013; 25 Suppl 2: 94-99. DOI: 10.1111/den.12080.
  28. Itoi T, Sofuni A, Itokawa F et al. Current status and issues regarding biliary stenting in unresectable biliary obstruction. *Digestive endoscopy : official journal of the Japan Gastroenterological Endoscopy Society* 2013; 25 Suppl 2: 63-70. DOI: 10.1111/den.12062.
  29. Jo JH, Park BH. Suprapapillary versus transpapillary stent placement for malignant biliary obstruction: which is better? *Journal of vascular and interventional radiology : JVIR* 2015; 26: 573-582. DOI: 10.1016/j.jvir.2014.11.043. Epub 2015 Feb 10.
  30. Jo J, Park B. Supra-papillary versus trans-papillary biliary stent for malignant biliary obstruction: Which is the better? *Journal of Vascular and Interventional Radiology* 2014; 25: S48. DOI: 10.1016/j.jvir.2013.12.115
  31. Jprn U. Efficacy and Safety of inside stent for preoperative biliary drainage in patients with malignant hilar biliary obstruction: prospective, multicenter, single-arm study. <http://www.who.int/trialsearch/Trial2.aspx?TrialID=JPRN-UMIN000014111> 2014.
  32. Jprn U. Efficacy and safety of inside stent in patients with biliary stricture: a prospective multicenter study. <http://www.who.int/trialsearch/Trial2.aspx?TrialID=JPRN-UMIN000013291> 2014.
  33. Jprn U. The efficacy and safety of non-flared fully covered self expandable metallic stent for benign biliary duct stricture. <http://www.who.int/trialsearch/Trial2.aspx?TrialID=JPRN-UMIN000025027> 2016.
  34. Jprn U. Usefulness of Non-flared Intraductal Fully Covered Metallic Stent for Refractory Biliary Strictures after Living Donor Liver Transplantation. <http://www.who.int/trialsearch/Trial2.aspx?TrialID=JPRN-UMIN000021261> 2016.
  35. Jprn U. A Newly Modified Non-Flared Fully Covered Metallic Stent of 12 mm-Diameter with Long Lasso for Intraductal Placement in Patients with Malignant Biliary Stricture: feasibility Study. <http://www.who.int/trialsearch/Trial2.aspx?TrialID=JPRN-UMIN000013276> 2014.
  36. Jprn U. Plastic stent placement above the sphincter of Oddi ("inside-stent") for patients of malignant hilar biliary obstruction. A prospective phase II trial. <http://www.who.int/trialsearch/Trial2.aspx?TrialID=JPRN-UMIN000006779> 2011.
  37. Jprn U. Endoscopic treatment of malignant bile duct stricture; Comparative study of conventional stent vs inside stent. <http://www.who.int/trialsearch/Trial2.aspx?TrialID=JPRN-UMIN000006345> 2011.
  38. Jprn U. Inside-stent placement for malignant hilar obstruction. <http://www.who.int/trialsearch/Trial2.aspx?TrialID=JPRN-UMIN000004587> 2011.
  39. Jprn U. Randomized control trial of inside stenting using plastic stent and side by side stenting using 6mm full-covered self expandable metallic stent for endoscopic bilateral biliary drainage to malignant hilar biliary obstruction. <http://www.who.int/trialsearch/Trial2.aspx?TrialID=JPRN-UMIN000034036> 2018.
  40. Jprn U. Randomized controlled trial on efficacy of metal stents vs. inside plastic stents for unresectable malignant obstruction of the perihilar bile duct. <http://www.who.int/trialsearch/Trial2.aspx?TrialID=JPRN-UMIN000025760> 2017.
  41. Jprn U. Safety and efficacy of preoperative biliary drainage using plastic stent above the sphincter of Oddi (Inside-stent) in patients with malignant hilar biliary obstruction: a prospective study. <http://www.who.int/trialsearch/Trial2.aspx?TrialID=JPRN-UMIN000025463> 2017.
  42. Jprn U. The Usefulness of Newly Modified Non-flared Fully Covered Metal Stent of 12 mm in diameter Comparing with Conventional Stent for Periapillary Malignant Biliary Strictures. <http://www.who.int/trialsearch/Trial2.aspx?TrialID=JPRN-UMIN000030201> 2017.
  43. Jprn U. Efficacy of inside plastic stent placement for malignant hilar biliary obstruction -multicenter, randomized control trial. <http://www.who.int/trialsearch/Trial2.aspx?TrialID=JPRN-UMIN000036315> 2019.
  44. Jun CH, Park CH, Jeon J et al. Feasibility of self-expandable metal stents for preservation of sphincter of Oddi function in patients with common bile duct stones: A pilot study. *Gastrointestinal Endoscopy* 2015; 82: 719-723. DOI: 10.1016/j.gie.2015.01.034
  45. Kaneko T, Sugimori K, Shimizu Y et al. Efficacy of plastic stent placement inside bile ducts for the treatment of unresectable malignant hilar obstruction (with videos). *Journal of hepato-biliary-pancreatic sciences* 2014; 21: 349-355. DOI: 10.1002/jhbp.41. Epub 2013 Oct 7.
  46. Kawakami H, Kuwatani M, Eto K et al. Covered metallic stent for ischemic hilar biliary stricture. *Digestive endoscopy : official journal of the Japan Gastroenterological Endoscopy Society* 2012; 24 Suppl 1: 49-54. DOI: 10.1111/j.1443-1661.2012.01259.x.
  47. Kogure H, Isayama H, Tsujino T et al. Plastic stent placement above the sphincter of Oddi ("inside stent") for biliary strictures. *Gastroenterological Endoscopy* 2011; 53: 1312-1319.
  48. Kogure H, Tsujino T, Isayama H et al. Endoscopic management of biliary strictures after adult living donor liver transplantation with duct-to-duct reconstruction. *Journal of Gastroenterology and Hepatology* 2012; 27: 21-22. DOI: 10.1111/jgh.12005
  49. Kogure H, Tsujino T, Isayama H et al. Endoscopic management of biliary strictures after adult living donor liver transplantation with duct-to-duct reconstruction. *Gastrointestinal Endoscopy* 2013; 77: AB317-AB318.
  50. Koizumi M, Kumagi T, Kuroda T et al. Endoscopic stent placement above the sphincter of Oddi for biliary strictures after living donor liver transplantation. *BMC gastroenterology* 2020; 20: 92. DOI: 10.1186/s12876-020-01226-x.

- 
51. Koizumi M, Kumagi T, Kuroda T et al. ENDOSCOPIC STENT PLACEMENT ABOVE THE SPHINCTER OF ODDI FOR BILIARY STRICTURES AFTER LIVING DONOR LIVER TRANSPLANTATION. *Gastrointestinal Endoscopy* 2019; 89: AB214. DOI: 10.1016/j.gie.2019.03.194
  52. Kubota K, Hasegawa S, Ishii K et al. Inside stent and neoadjuvant chemotherapy can provide a chance of surgery in patients with symptomatic, initially unresectable klatskin tumors. *Gastrointestinal Endoscopy* 2015; 81: AB348. DOI: 10.1016/j.gie.2015.03.567
  53. Kurita A, Kodama Y, Minami R et al. Endoscopic stent placement above the intact sphincter of Oddi for biliary strictures after living donor liver transplantation. *Journal of gastroenterology* 2013; 48: 1097-1104. DOI: 10.1007/s00535-012-0705-x. Epub 2013 Jan 17.
  54. Lee HW, Moon JH, Lee YN et al. Usefulness of newly modified fully covered metallic stent of 12 mm in diameter and anti-migration feature for perianipillary malignant biliary strictures: Comparison with conventional standard metal stent. *Journal of Gastroenterology and Hepatology (Australia)* 2019; 34: 1208-1213. DOI: 10.1111/jgh.14602
  55. Lee J, Gwon DI, Ko GY et al. Biliary intraductal metastasis from advanced gastric cancer: radiologic and histologic characteristics, and clinical outcomes of percutaneous metallic stent placement. *European radiology* 2016; 26: 1649-1655. DOI: 10.1007/s00330-015-3995-6. Epub 2015 Sep 17.
  56. Lee JK, Yang J, Park JK et al. Newly developed flower-type covered selfexpandable metal stent for preventing cholecystitis and pancreatitis: Physical properties. *United European Gastroenterology Journal* 2016; 4: A417-A418. DOI: 10.1177/2050640616663689
  57. Lee DH, Yu JS, Hwang JC et al. Percutaneous placement of self-expandable metallic biliary stents in malignant extrahepatic strictures: indications of transpapillary and suprapapillary methods. *Korean journal of radiology* 2000; 1: 65-72. DOI: 10.3348/kjr.2000.1.2.65.
  58. Leung JW, Lee W, Wilson R et al. Comparison of accessory performance using a novel ERCP mechanical simulator. *Endoscopy* 2008; 40: 983-988. DOI: 10.1055/s-2008-1077777. 2008 Dec 8.
  59. Li Q, Qin Y, Yang F et al. Treatment experience of fully covered self-expandable metal stents in biliary stricture after liver transplantation. *Liver Transplantation* 2014; 20: S365. DOI: 10.1002/lt.23901
  60. Liu Q, Khay G, Cotton PB. Feasibility of stent placement above the sphincter of Oddi ("inside-stent") for patients with malignant biliary obstruction. *Endoscopy* 1998; 30: 687-690. DOI: 10.1055/s-2007-1001389.
  61. Moon JH, Choi HJ, Koo HC et al. Feasibility of placing a modified fully covered self-expandable metal stent above the papilla to minimize stent-induced bile duct injury in patients with refractory benign biliary strictures (with videos). *Gastrointestinal endoscopy* 2012; 75: 1080-1085. DOI: 10.1016/j.gie.2012.01.016. Epub 2012 Mar 7.
  62. Moon JH, Choi HJ, Lee YN et al. A newly modified non-flared fully covered metallic stent of 12 mm-diameter with long lasso for intraductal placement in patients with malignant biliary stricture: Feasibility study. *Gastrointestinal Endoscopy* 2015; 81: AB399. DOI: 10.1016/j.gie.2015.03.705
  63. Moon JH, Ko BM, Hong SJ et al. Biliary drainage with a modified fully covered self-expandable metallic stent for potentially resectable distal malignant biliary obstruction. *Journal of Gastroenterology and Hepatology* 2012; 27: 86. DOI: 10.1111/jgh.12006
  64. Moon JH, Lee YN, Choi HJ et al. Usefulness of non-flared intraductal fully covered metallic stent for refractory biliary strictures after living donor liver transplantation: Interim results of a prospective multicenter trial. *Gastrointestinal Endoscopy* 2016; 83: AB134.
  65. Morita S. [Biliary endoprosthesis of malignant biliary obstruction using expandable metallic stent--preliminary clinical evaluation]. *Nihon Igaku Hoshasen Gakkai zasshi Nippon acta radiologica* 1992; 52: 623-640.
  66. Mukai T. Ways to improve stenting in unresectable malignant distal biliary obstruction: Stent design, intraductal placement, and protective role of an intact papilla? *Digestive endoscopy : official journal of the Japan Gastroenterological Endoscopy Society* 2020; 32: 891-893. DOI: 10.1111/den.13714. 2020 Jul 27.
  67. Nct. Comparison Between Transpapillary and Suprapapillary Metal Stent. <https://clinicaltrials.gov/show/NCT04503291> 2020.
  68. Nct. Intraintestinal Extended Biliary Stents Preventing Duodenobiliary Reflux in Patients With Biliary Stricture. <https://clinicaltrials.gov/show/NCT04550819> 2020.
  69. Park SK, Moon JH, Choi HJ et al. Intraductal placement of modified fully covered metallic stent for distal malignant biliary obstruction. *Journal of Gastroenterology and Hepatology (Australia)* 2014; 29: 152. DOI: 10.1111/jgh.12766\_2
  70. Park JK, Moon JH, Lee YN et al. Intraductal placement of non-flared fully covered metallic stent for refractory anastomotic biliary strictures after living donor liver transplantation: Long-term results of prospective multicenter trial. *Journal of Gastroenterology and Hepatology* 2019; 34: 58. DOI: 10.1111/jgh.14862
  71. Pécsi D, Vincze Á. Are Suprapapillary Biliary Stents Superior to Transpapillary Biliary Stents? *Digestive Diseases and Sciences* 2020; 65: 925-927. DOI: 10.1007/s10620-020-06068-x
  72. Peixoto A, Moutinho-Ribeiro P, Macedo G. Degenerate intraductal papillary mucinous carcinoma with fish-mouth appearance of the papilla. *Journal of Gastrointestinal and Liver Diseases* 2017; 26: 113. DOI: 10.15403/jgld.2014.1121.262.pex
  73. Sackmann M. Bile duct stenosis: Diagnosis and management by endoscopy. *Journal of Gastrointestinal and Liver Diseases* 2016; 25: 18.
  74. Sandha GS, Roy A, Maniere T et al. Clinical utility of biliary metal stent use across a broad range of indications-interim results of a large prospective multi-centre Canadian registry. *Gastrointestinal Endoscopy* 2016; 83: AB250-AB251.

- 
75. Sasahira N, Isayama H, Kogure H et al. Endoscopic management with inside stent for proximal benign biliary stricture after laparoscopic cholecystectomy. *Digestive endoscopy : official journal of the Japan Gastroenterological Endoscopy Society* 2012; 24 Suppl 1: 59-61. DOI: 10.1111/j.1443-1661.2012.01271.x.
  76. Sato T, Kogure H, Isayama H et al. Endoscopic treatment of biliary strictures after adult living donor liver transplantation with duct-to-duct reconstruction. *Digestive Endoscopy* 2017; 29: 153. DOI: 10.1111/den.12775
  77. Sato T, Kogure H, Nakai Y et al. Long-term outcomes of endoscopic treatment for duct-to-duct anastomotic strictures after living donor liver transplantation. *Liver international : official journal of the International Association for the Study of the Liver* 2019; 39: 1954-1963. DOI: 10.1111/liv.14219.
  78. Shin J, Park JS, Jeong S et al. Comparison of the clinical outcomes of suprapapillary and transpapillary stent insertion in unresectable cholangiocarcinoma with biliary obstruction. *United European Gastroenterology Journal* 2019; 7: 496. DOI: 10.1177/205064061985467
  79. Sung JY, Leung JWC, Shaffer EA et al. Ascending infection of the biliary tract after surgical sphincterotomy and biliary stenting. *Journal of Gastroenterology and Hepatology* 1992; 7: 240-245.
  80. Takada R, Ikezawa K, Kiyota R et al. THE EFFICACY OF SELF-EXPANDABLE METALLIC STENT PLACEMENT ABOVE THE PAPILLA IN THE PATIENTS WITH DISTAL MALIGNANT BILIARY OBSTRUCTION. *Gastrointestinal Endoscopy* 2019; 89: AB212. DOI: 10.1016/j.gie.2019.03.189
  81. Takahashi Y, Ito H, Inoue Y et al. Initial experience of endoscopic stent placement above the Oddi (inside-stent) for preoperative malignant biliary obstruction. *Journal of Hepato-Biliary-Pancreatic Sciences* 2017; 24: A297.
  82. Taniguchi Y. Intraductal versus transpapillary fully covered self-expandable metal stent placement for malignant biliary strictures. *Gastrointestinal Endoscopy* 2018; 87: AB199.
  83. Taniguchi Y. Intraductal vs. transpapillary fully covered metal stent placement for malignant biliary strictures. *United European Gastroenterology Journal* 2019; 7: 860. DOI: 10.1177/205064061985467
  84. Walters DA, Geenen JE. Current role of endoscopic retrograde cholangiopancreatography in the management of benign pancreatic disease. *Endoscopy* 1998; 30: 174-181. DOI: 10.1055/s-2007-1001244
  85. Yamaguchi A, Wada K, Moriuchi R et al. Intraductal plastic stent placement is an effective therapy for unresectable malignant biliary obstruction. *United European Gastroenterology Journal* 2019; 7: 572. DOI: 10.1177/205064061985467
  86. Yamaguchi A, Miyasako Y, Takasago T et al. Intraductal plastic stent placement is an effective therapy for malignant biliary strictures. *United European Gastroenterology Journal* 2016; 4: A179. DOI: 10.1177/2050640616663689
  87. Yamauchi H, Tadehara M, Kida M. Temporary non-flared fully covered self-expandable metal stent placement for refractory benign choledochojunal anastomotic stricture. *Digestive Endoscopy* 2018; 30: 541-542. DOI: 10.1111/den.13069
  88. Yang MJ, Lee GH, Kim JH et al. Hepatobiliary and Pancreatic: Management of a benign bilio-enteric stricture by a novel covered stent with a long lasso. *Journal of Gastroenterology and Hepatology (Australia)* 2019; 34: 1477. DOI: 10.1111/jgh.14747
  89. Yoo JJ, Lee JK, Moon JH et al. Intraductal placement of non-flared fully covered metallic stent for refractory anastomotic biliary strictures after living donor liver transplantation: Long-term results of prospective multicenter trial. *Journal of gastroenterology and hepatology* 2020; 35: 492-498. DOI: 10.1111/jgh.14831. 2019 Sep 10.
  90. Zeissig S, Schmelz R, Brückner S et al. Direct endoscopy and diagnosis of adenocarcinoma following metal stent-based drainage of a pancreatic cyst. *Endoscopy* 2018; 50: E72-E73. DOI: 10.1055/s-0043-124182
  91. Brijbassie A. Transpapillary vs. intraductal fully covered selfexpanding metal stent placement for malignant and benign biliary disease: does it make a difference? *Journal of Interventional Gastroenterology* 2015; 5. DOI: 10.7178/jig.192
  92. Cho JN HJ, Kim HG, Shin IH, Park SH, Moon JH, Kim JH, Lee DH, Maetani I, Maguchi H, Hanada K, Yasuda I, Itoi T, Isayama H, Lee D. Prospective randomized trial comparing covered metal stent placed above and across the sphincter of oddi in malignant biliary obstruction. *Gastrointestinal endoscopy* 2013; 77.
  93. Cosgrove N, Siddiqui AA, Adler DG et al. A Comparison of Bilateral Side-by-Side Metal Stents Deployed Above and Across the Sphincter of Oddi in the Management of Malignant Hilar Biliary Obstruction. *J Clin Gastroenterol* 2017; 51: 528-533. DOI: 10.1097/mcg.0000000000000584
  94. Inatomi O, Bamba S, Shioya M et al. Threaded biliary inside stents are a safe and effective therapeutic option in cases of malignant hilar obstruction. *BMC Gastroenterology* 2013; 13: 31. DOI: 10.1186/1471-230X-13-31
  95. Kobayashi N, Watanabe S, Hosono K et al. Endoscopic inside stent placement is suitable as a bridging treatment for preoperative biliary tract cancer. *BMC Gastroenterology* 2015; 15: 8. DOI: 10.1186/s12876-015-0233-2
  96. Kubota K, Hasegawa S, Iwasaki A et al. Stent placement above the sphincter of Oddi permits implementation of neoadjuvant chemotherapy in patients with initially unresectable Klatskin tumor. *Endosc Int Open* 2016; 4: E427-433. DOI: 10.1055/s-0042-102246
  97. Lee HM, JH; Choi, HJ; Lee, YN; Lee, TH; Choi, MH; Cha, SW; Cho, YD; Park, SH. MODIFIED FULLY COVERED SELF-EXPANDABLE METAL STENT VERSUS PLASTIC STENT FOR PREOPERATIVE BILIARY DRAINAGE IN PATIENTS WITH RESECTABLE MALIGNANT BILIARY OBSTRUCTION. *Endoscopy* 2018; 44 - 45.
  98. Pedersen FM, Lassen AT, Schaffalitzky de Muckadell OB. Randomized trial of stent placed above and across the sphincter of Oddi in malignant bile duct obstruction. *Gastrointestinal endoscopy* 1998; 48: 574-579. DOI: 10.1016/s0016-5107(98)70038-0.
  99. Shin J, Park JS, Jeong S et al. Comparison of the Clinical Outcomes of Suprapapillary and Transpapillary Stent Insertion in Unresectable Cholangiocarcinoma with Biliary Obstruction. *Digestive diseases and sciences* 2020; 65: 1231-1238. DOI: 10.1007/s10620-019-05859-1 10.1007/s10620-019-05859-1. Epub 2019 Oct 4.

- 
100. Takada R, Ikezawa K, Kiyota R et al. Self-expandable metallic stent placement above the papilla without endoscopic sphincterotomy in patients with distal malignant biliary obstruction. *Endoscopy international open* 2020; 8: E753-e760. DOI: 10.1055/a-1135-8437. 2020 May 25.
  101. Taniguchi Y. Intraductal vs. transpapillary fully covered metal stent placement for malignant biliary strictures. *GASTROINTESTINAL ENDOSCOPY* 2020; 91.
  102. Uchida N, Tsutsui K, Ezaki T et al. Estimation of the stent placement above the intact sphincter of Oddi against malignant bile duct obstruction. *Journal of Gastroenterology* 2005; 40: 291-296. DOI: 10.1007/s00535-004-1535-2
  103. Yamaguchi A, Moriuchi, R., Wada, K., Tao, K., Konishi, H., Miura, R., ... & Kouno, H. Intraductal Plastic Stent Placement is an Effective Therapy for Unresectable Malignant Hilar Biliary Obstruction. *JOURNAL OF GASTROENTEROLOGY AND HEPATOLOGY* 2019; 34: 175-175.
